# Supplementary material for: THOP1 Is Entailed in a Genetic Fingerprint Associated with Late-Onset Alzheimer’s Disease
Source: Preprints.org preprint supplement (doi:10.20944/preprints202410.0335.v1), 2024-10-04
Supplement: Supplementary file 1 [file supplementary]

## Sheet: S1_Annotations
Table S1 Annotations for the 23 SNPs in the AD risk pattern. Data taken from 'InfiniumOmni2-5-8v1-3_A1.annotated.txt' file supplied by Illumina.
Name	Chr	Position	AA_Freq	AB_Freq	BB_Freq	Call_Freq	Minor_Freq
rs10409851	19	2726199	0.317881	0.412803	0.269316	0.995604	0.475717
kgp1758027	19	2727498	0.202198	0.382418	0.415385	1	0.393407
rs4806874	19	2738352	0.307692	0.413187	0.279121	1	0.485714
rs10415622	19	2739696	0.307692	0.413187	0.279121	1	0.485714
kgp553088	19	2740229	0.277533	0.4163	0.306167	0.997802	0.485683
rs12608998	19	2753270	0.174393	0.388521	0.437086	0.995604	0.368653
rs8105402	19	2753983	0.206593	0.410989	0.382418	1	0.412088
kgp4303224	19	2754792	0.173719	0.389755	0.436526	0.986813	0.368597
kgp5034493	19	2754810	0.103753	0.339956	0.556291	0.995604	0.273731
rs7008	19	2754978	0.343612	0.400881	0.255507	0.997802	0.455947
rs2238614	19	2755339	0.0967033	0.340659	0.562637	1	0.267033
kgp8397108	19	2762585	0.358242	0.391209	0.250549	1	0.446154
rs2110118	19	2775144	0.364835	0.408791	0.226374	1	0.430769
rs4807330	19	2777662	0.0989011	0.347253	0.553846	1	0.272527
rs1640262	19	2779134	0.345055	0.391209	0.263736	1	0.459341
kgp5523730	19	2781325	0.465934	0.362637	0.171429	1	0.352747
rs1736192	19	2784678	0.101099	0.340659	0.558242	1	0.271429
kgp7878898	19	2792566	0.248352	0.441758	0.30989	1	0.469231
kgp726867	19	2793289	0.292308	0.415385	0.292308	1	0.5
rs2260416	19	2796355	0.123348	0.442731	0.433921	0.997802	0.344714
rs1736181	19	2797703	0.243956	0.446154	0.30989	1	0.467033
rs1640271	19	2799979	0.127472	0.441758	0.430769	1	0.348352

## Sheet: S2_ASW
Table S2 Genotypes for available SNPs corresponding to the 23-SNP pattern for the ASW individuals in the HapMap data.
rs#	rs4806874	rs10415622	rs12608998	rs8105402	rs7008	rs2238614	rs1860938	rs2110118	rs4807330	rs1640262	rs1736192	rs1640271
alleles	A/G	A/G	G/T	C/T	C/T	A/G	A/C	C/T	A/G	C/T	A/G	C/T
chrom	chr19	chr19	chr19	chr19	chr19	chr19	chr19	chr19	chr19	chr19	chr19	chr19
pos	2689352	2690696	2704270	2704983	2705978	2706339	2711878	2726144	2728662	2730134	2735678	2750979		ASW
QCcode	QC+	QC+	QC+	QC+	QC+	QC+	QC+	QC+	QC+	QC+	QC+	QC+		Carrier Frequency =		0.356322
NA19711	AA	AA	GG	CC	TT	GG	AA	TT	GG	TT	GG	CC		1
NA19714	AA	AA	GG	CC	TT	GG	AA	TT	GG	TT	GG	CC		2
NA20129	AG	AG	GG	CC	TT	GG	AA	TT	GG	TT	GG	CC		3
NA20300	AG	AG	GG	CC	TT	GG	AA	TT	GG	TT	GG	CC		4
NA20347	AG	AG	GG	CC	TT	GG	AA	TT	GG	TT	GG	CC		5
NA20351	AG	AG	GG	CC	TT	GG	AA	TT	GG	TT	GG	CC		6
NA20298	AG	AG	GG	CC	TT	GG	AC	CT	GG	CT	GG	CC		7
NA19902	AG	AG	GG	CT	TT	GG	AC	CT	GG	CT	GG	CC		8
NA19901	AG	AG	GG	CT	TT	GG	AC	CT	GG	CT	GG	CC		9
NA20281	AG	AG	GG	CT	TT	GG	AC	CT	GG	CT	GG	CC		10
NA19904	AG	AG	GG	CC	CT	GG	AC	CT	GG	CT	GG	CC		11
NA20344	AG	AG	GG	CC	CT	GG	AC	CT	GG	CT	GG	CC		12
NA19836	AG	AG	GG	CT	CT	GG	AC	CT	GG	CT	GG	CC		13
NA19834	AG	AG	GT	CT	CT	GG	AC	CT	GG	CT	GG	CC		14
NA19900	AG	AG	GT	CT	CT	GG	AC	CT	GG	CT	GG	CC		15
NA19713	AG	AG	GT	CT	CT	GG	AC	CT	GG	CT	GG	CC		16
NA20360	AA	AA	GG	CC	TT	GG	AA	TT	GG	TT	GG	CT		17
NA19921	AG	AG	GG	CC	TT	GG	AA	TT	GG	TT	GG	CT		18
NA19983	AG	AG	GG	CC	TT	GG	AA	TT	GG	TT	GG	CT		19
NA20126	AG	AG	GG	CC	TT	GG	AA	TT	GG	TT	GG	CT		20
NA20290	AG	AG	GG	CC	TT	GG	AA	TT	GG	TT	GG	CT		21
NA20359	AG	AG	GG	CT	CT	GG	AC	TT	GG	CT	GG	CT		22
NA20128	AG	AG	GT	CT	CT	GG	AC	CT	GG	CT	GG	CT		23
NA20292	AG	AG	GT	CT	CT	GG	AC	CT	GG	CT	GG	CT		24
NA20337	AG	AG	GT	CT	CT	GG	AC	CT	GG	CT	GG	CT		25
NA20350	AG	AG	GT	CT	CT	GG	AC	CT	GG	CT	GG	CT		26
NA19914	AG	AG	GG	CC	TT	GG	AA	CT	AG	CT	AG	CT		27
NA19625	AG	AG	GT	CT	CT	AG	AA	CT	AG	CT	AG	CT		28
NA20301	AG	AG	GT	CT	CT	AG	AA	CT	AG	CT	AG	CT		29
NA19985	AG	AG	GT	CT	CT	AG	AC	CT	AG	CT	AG	CT		30
NA20291	AG	AG	GT	CT	CT	AG	AC	CT	AG	CT	AG	CT		31
NA20349	AA	AA	GG	CC	TT	GG	AA	TT	GG	TT	GG	TT		1
NA19982	AG	AG	GT	CT	CT	GG	AC	CT	GG	CT	GG	TT		2
NA19915	AA	AA	GG	CC	TT	GG	AA	CT	AG	CT	AG	TT		3
NA19909	AG	AG	GT	CT	CT	AG	AC	CC	AA	CC	AA	CT		4
NA20340	AG	AG	GT	CT	CC	GG	CC	CC	AG	CC	AG	CT		5
NA19916	AG	AG	GG	TT	CC	GG	CC	CT	GG	CC	GG	CT		6
NA20363	AG	AG	GG	TT	CC	GG	CC	TT	GG	CC	GG	CT		7
NA20335	AG	AG	GT	TT	CC	GG	CC	CT	GG	CC	GG	CC		8
NA20334	AG	AG	GT	TT	CC	GG	CC	CT	GG	CC	GG	CC		9
NA20336	AG	AG	GT	TT	CC	GG	CC	CT	GG	CC	GG	CC		10
NA20364	AG	AG	GT	TT	CC	GG	CC	CT	GG	CC	GG	CC		11
NA19700	GG	GG	GT	TT	CT	GG	CC	CC	GG	CC	GG	CC		12
NA19701	GG	GG	TT	TT	CC	AG	AC	CC	AG	CC	AG	TT		13
NA19702	GG	GG	TT	TT	CC	GG	CC	CC	GG	CC	GG	CT		14
NA19703	GG	GG	GT	CT	CT	AG	AA	CT	AG	CT	AG	CT		15
NA19704	GG	GG	GG	CC	CT	GG	AC	CT	GG	CT	GG	CC		16
NA19705	GG	GG	GT	CT	CT	AG	AA	CT	AG	CT	AG	CT		17
NA19708	GG	GG	GT	CT	CT	GG	CC	CC	GG	CC	GG	CC		18
NA19712	GG	GG	GG	CC	CC	GG	CC	CC	GG	CC	GG	CC		19
NA19818	GG	GG	GG	CC	CT	GG	AC	CT	GG	CT	GG	CC		20
NA19819	GG	GG	TT	TT	CC	AA	AC	CC	AA	CC	AA	TT		21
NA19828	GG	GG	GT	CT	CC	AG	AC	CC	AG	CC	AG	CT		22
NA19835	GG	GG	GT	TT	CC	GG	CC	CC	GG	CC	GG	CC		23
NA19919	GG	GG	GT	CT	CC	AG	CC	CC	AG	CC	AG	CT		24
NA19908	GG	GG	GG	CC	CC	GG	CC	CC	GG	CC	GG	CT		25
NA19917	GG	GG	GG	CT	CT	GG	AC	TT	GG	CT	GG	CT		26
NA19918	GG	GG	GG	CT	CT	GG	AC	CT	GG	CT	GG	CT		27
NA19984	GG	GG	TT	TT	CC	AG	CC	CC	AG	CC	NN	CT		28
NA20127	GG	GG	TT	TT	CC	GG	CC	CC	AG	CC	AG	CT		29
NA20277	GG	GG	GT	CT	CC	AG	AC	CC	AG	CC	AG	CT		30
NA20276	GG	GG	GT	TT	CC	AG	AC	CT	AG	CC	AG	TT		31
NA20279	GG	GG	TT	TT	CC	AG	AC	CC	AG	CC	AG	CT		32
NA20282	GG	GG	GT	CT	CT	AG	AA	CT	AG	CT	AG	CT		33
NA20284	GG	GG	GT	CT	CT	AG	AA	CT	AG	CT	AG	CT		34
NA20287	GG	GG	GT	CT	CT	GG	CC	CC	GG	CC	GG	CC		35
NA20288	GG	GG	GT	TT	CC	GG	CC	CT	GG	CC	GG	CT		36
NA20289	GG	GG	GT	CT	CT	GG	AC	CT	GG	CT	GG	CT		37
NA20295	GG	GG	TT	TT	CC	AG	AC	CC	AG	CC	AG	TT		38
NA20294	GG	GG	GT	CT	CC	GG	CC	CC	GG	CC	GG	CT		39
NA20297	GG	GG	TT	TT	CC	AG	AC	CC	AG	CC	AG	TT		40
NA20302	GG	GG	GT	CT	CT	AG	AA	CT	AG	CT	AG	TT		41
NA20317	GG	GG	GT	CT	CT	AG	AC	CT	AG	CT	AG	CC		42
NA20319	GG	GG	TT	TT	CC	AA	AC	CC	AA	CC	AA	CT		43
NA20322	GG	GG	GT	TT	CC	AG	AC	CT	AG	CC	AG	TT		44
NA20333	GG	GG	TT	TT	CC	GG	CC	CC	GG	CC	GG	CC		45
NA20332	GG	GG	TT	TT	CC	GG	CC	CC	GG	CC	GG	CC		46
NA20341	GG	GG	GT	CT	CT	GG	AC	CT	GG	CT	GG	CT		47
NA20343	GG	GG	TT	TT	CC	GG	CC	CC	GG	CC	GG	CC		48
NA20342	GG	GG	GT	CT	CT	GG	AC	CT	GG	CT	GG	CC		49
NA20345	GG	GG	GG	CC	TT	GG	AA	TT	GG	TT	GG	CC		50
NA20346	GG	GG	GG	CT	CT	GG	AC	TT	GG	CT	GG	CT		51
NA20348	GG	GG	GT	CT	CT	GG	AC	CT	GG	CT	GG	CT		52
NA20357	GG	GG	GT	CT	CC	AG	AC	CC	AG	CC	AG	CT		53
NA20356	GG	GG	GT	CT	CT	GG	AC	CT	GG	CT	GG	CC		54
NA20358	GG	GG	TT	TT	CC	AG	AC	CC	AG	CC	AG	CT		55
NA20412	GG	GG	TT	TT	CC	AG	AC	CC	AG	CC	AG	TT		56

## Sheet: S3_CEU
Table S3 Genotypes for available SNPs corresponding to the 23-SNP pattern for the CEU individuals in the HapMap data.
rs#	rs10409851	rs4806874	rs10415622	rs12608998	rs8105402	rs7008	rs2238614	rs1860938	rs2110118	rs4807330	rs1640262	rs1736192	rs2260416	rs1736181	rs1640271
alleles	A/G	A/G	A/G	G/T	C/T	C/T	A/G	A/C	C/T	A/G	C/T	A/G	A/G	C/T	C/T
chrom	chr19	chr19	chr19	chr19	chr19	chr19	chr19	chr19	chr19	chr19	chr19	chr19	chr19	chr19	chr19		CEU
pos	2677199	2689352	2690696	2704270	2704983	2705978	2706339	2711878	2726144	2728662	2730134	2735678	2747355	2748703	2750979		Carrier Frequency =		0.878788
NA06994	AA	AA	AA	GG	CC	TT	GG	AA	TT	GG	TT	GG	NN	CC	CC		1
NA12057	AA	AA	AA	GG	CC	TT	GG	AA	TT	GG	TT	GG	NN	CC	CC		2
NA12815	AA	AA	AA	GG	CC	TT	GG	AA	TT	GG	TT	GG	NN	CC	CC		3
NA12872	AA	AA	AA	GG	CC	TT	GG	AA	TT	GG	TT	GG	NN	CC	CC		4
NA10863	AG	AG	AG	GG	CC	TT	GG	AA	TT	GG	TT	GG	NN	CC	CC		5
NA12750	AG	AG	AG	GT	CT	CT	AG	AC	CT	AG	CT	AG	NN	CC	CC		6
NA06993	AA	AA	AA	GG	CC	TT	GG	AA	TT	GG	TT	GG	GG	CC	CC		7
NA07000	AA	AA	AA	GG	CC	TT	GG	AA	TT	GG	TT	GG	GG	CC	CC		8
NA07029	AA	AA	AA	GG	CC	TT	GG	AA	TT	GG	TT	GG	GG	CC	CC		9
NA07055	AA	AA	AA	GG	CC	TT	GG	AA	TT	GG	TT	GG	GG	CC	CC		10
NA10835	AA	AA	AA	GG	CC	TT	GG	AA	TT	GG	TT	GG	GG	CC	CC		11
NA10859	AA	AA	AA	GG	CC	TT	GG	AA	TT	GG	TT	GG	GG	CC	CC		12
NA11830	AA	AA	AA	GG	CC	TT	GG	AA	TT	GG	TT	GG	GG	CC	CC		13
NA11839	AA	AA	AA	GG	CC	TT	GG	AA	TT	GG	TT	GG	GG	CC	CC		14
NA11882	AA	AA	AA	GG	CC	TT	GG	AA	TT	GG	TT	GG	GG	CC	CC		15
NA12056	AA	AA	AA	GG	CC	TT	GG	AA	TT	GG	TT	GG	GG	CC	CC		16
NA12144	AA	AA	AA	GG	CC	TT	GG	AA	TT	GG	TT	GG	GG	CC	CC		17
NA12264	AA	AA	AA	GG	CC	TT	GG	AA	TT	GG	TT	GG	GG	CC	CC		18
NA12802	AA	AA	AA	GG	CC	TT	GG	AA	TT	GG	TT	GG	GG	CC	CC		19
NA12813	AA	AA	AA	GG	CC	TT	GG	AA	TT	GG	TT	GG	GG	CC	CC		20
NA12864	AA	AA	AA	GG	CC	TT	GG	AA	TT	GG	TT	GG	GG	CC	CC		21
NA12875	AA	AA	AA	GG	CC	TT	GG	AA	TT	GG	TT	GG	GG	CC	CC		22
NA06991	AA	AG	AG	GG	CC	TT	GG	AA	TT	GG	TT	GG	GG	CC	CC		23
NA07357	AG	AG	AG	GG	CC	TT	GG	AA	TT	GG	TT	GG	GG	CC	CC		24
NA10830	AG	AG	AG	GG	CC	TT	GG	AA	TT	GG	TT	GG	GG	CC	CC		25
NA12006	AG	AG	AG	GG	CC	TT	GG	AA	TT	GG	TT	GG	GG	CC	CC		26
NA12154	AG	AG	AG	GG	CC	TT	GG	AA	TT	GG	TT	GG	GG	CC	CC		27
NA12234	AG	AG	AG	GG	CC	TT	GG	AA	TT	GG	TT	GG	GG	CC	CC		28
NA12873	AG	AG	AG	GG	CC	TT	GG	AA	TT	GG	TT	GG	GG	CC	CC		29
NA10846	AG	AG	AG	GT	CT	CT	GG	AC	CT	GG	CT	GG	NN	CT	CC		30
NA12145	AG	AG	AG	GT	CT	CT	GG	AC	CT	GG	CT	GG	GG	CT	CC		31
NA12282	AG	AG	AG	GG	CC	TT	NN	AA	TT	GG	TT	GG	NN	NN	CC		32
NA07014	AA	AA	AA	GG	CC	TT	GG	AA	TT	GG	TT	GG	NN	NN	CC		33
NA07037	AA	AA	AA	GG	CC	TT	GG	AA	TT	GG	TT	GG	NN	NN	CC		34
NA07051	AA	AA	AA	GG	CC	TT	GG	AA	TT	GG	TT	GG	NN	NN	CC		35
NA07346	AA	AA	AA	GG	CC	TT	GG	AA	TT	GG	TT	GG	NN	NN	CC		36
NA07349	AA	AA	AA	GG	CC	TT	GG	AA	TT	GG	TT	GG	NN	NN	CC		37
NA10836	AA	AA	AA	GG	CC	TT	GG	AA	TT	GG	TT	GG	NN	NN	CC		38
NA10837	AA	AA	AA	GG	CC	TT	GG	AA	TT	GG	TT	GG	NN	NN	CC		39
NA10845	AA	AA	AA	GG	CC	TT	GG	AA	TT	GG	TT	GG	NN	NN	CC		40
NA10864	AA	AA	AA	GG	CC	TT	GG	AA	TT	GG	TT	GG	NN	NN	CC		41
NA11893	AA	AA	AA	GG	CC	TT	GG	AA	TT	GG	TT	GG	NN	NN	CC		42
NA11894	AA	AA	AA	GG	CC	TT	GG	AA	TT	GG	TT	GG	NN	NN	CC		43
NA11931	AA	AA	AA	GG	CC	TT	GG	AA	TT	GG	TT	GG	NN	NN	CC		44
NA12045	AA	AA	AA	GG	CC	TT	GG	AA	TT	GG	TT	GG	NN	NN	CC		45
NA12273	AA	AA	AA	GG	CC	TT	GG	AA	TT	GG	TT	GG	NN	NN	CC		46
NA12275	AA	AA	AA	GG	CC	TT	GG	AA	TT	GG	TT	GG	NN	NN	CC		47
NA12340	AA	AA	AA	GG	CC	TT	GG	AA	TT	GG	TT	GG	NN	NN	CC		48
NA12344	AA	AA	AA	GG	CC	TT	GG	AA	TT	GG	TT	GG	NN	NN	CC		49
NA12347	AA	AA	AA	GG	CC	TT	GG	AA	TT	GG	TT	GG	NN	NN	CC		50
NA12348	AA	AA	AA	GG	CC	TT	GG	AA	TT	GG	TT	GG	NN	NN	CC		51
NA12386	AA	AA	AA	GG	CC	TT	GG	AA	TT	GG	TT	GG	NN	NN	CC		52
NA12400	AA	AA	AA	GG	CC	TT	GG	AA	TT	GG	TT	GG	NN	NN	CC		53
NA12489	AA	AA	AA	GG	CC	TT	GG	AA	TT	GG	TT	GG	NN	NN	CC		54
NA12739	AA	AA	AA	GG	CC	TT	GG	AA	TT	GG	TT	GG	NN	NN	CC		55
NA12748	AA	AA	AA	GG	CC	TT	GG	AA	TT	GG	TT	GG	NN	NN	CC		56
NA12749	AA	AA	AA	GG	CC	TT	GG	AA	TT	GG	TT	GG	NN	NN	CC		57
NA12766	AA	AA	AA	GG	CC	TT	GG	AA	TT	GG	TT	GG	NN	NN	CC		58
NA12777	AA	AA	AA	GG	CC	TT	GG	AA	TT	GG	TT	GG	NN	NN	CC		59
NA12817	AA	AA	AA	GG	CC	TT	GG	AA	TT	GG	TT	GG	NN	NN	CC		60
NA12818	AA	AA	AA	GG	CC	TT	GG	AA	TT	GG	TT	GG	NN	NN	CC		61
NA12827	AA	AA	AA	GG	CC	TT	GG	AA	TT	GG	TT	GG	NN	NN	CC		62
NA12828	AA	AA	AA	GG	CC	TT	GG	AA	TT	GG	TT	GG	NN	NN	CC		63
NA12829	AA	AA	AA	GG	CC	TT	GG	AA	TT	GG	TT	GG	NN	NN	CC		64
NA12830	AA	AA	AA	GG	CC	TT	GG	AA	TT	GG	TT	GG	NN	NN	CC		65
NA12832	AA	AA	AA	GG	CC	TT	GG	AA	TT	GG	TT	GG	NN	NN	CC		66
NA12843	AA	AA	AA	GG	CC	TT	GG	AA	TT	GG	TT	GG	NN	NN	CC		67
NA06984	AA	AG	AG	GG	CC	TT	GG	AA	TT	GG	TT	GG	NN	NN	CC		68
NA06989	AG	AG	AG	GG	CC	TT	GG	AA	TT	GG	TT	GG	NN	NN	CC		69
NA07031	AG	AG	AG	GG	CC	TT	GG	AA	TT	GG	TT	GG	NN	NN	CC		70
NA07045	AG	AG	AG	GG	CC	TT	GG	AA	TT	GG	TT	GG	NN	NN	CC		71
NA11843	AG	AG	AG	GG	CC	TT	GG	AA	TT	GG	TT	GG	NN	NN	CC		72
NA12399	AG	AG	AG	GG	CC	TT	GG	AA	TT	GG	TT	GG	NN	NN	CC		73
NA12842	AG	AG	AG	GG	CC	TT	GG	AA	TT	GG	TT	GG	NN	NN	CC		74
NA12877	AG	AG	AG	GT	CT	CT	GG	AC	CT	GG	CT	GG	NN	NN	CC		75
NA12890	AG	AG	AG	GT	CT	CT	GG	AC	CT	GG	CT	GG	NN	NN	CC		76
NA06995	AG	AG	AG	GT	CT	CT	GG	AC	CT	AG	CT	AG	NN	NN	CC		77
NA07435	AG	AG	AG	GT	CT	CT	GG	AC	CT	AG	CT	AG	NN	NN	CC		78
NA12335	AA	AA	AA	GT	CT	CT	AG	AC	CT	AG	CT	AG	NN	NN	CC		79
NA12341	AA	AA	AA	GT	CT	CT	AG	AC	CT	AG	CT	AG	NN	NN	CC		80
NA07345	AG	AG	AG	GG	CC	CT	GG	AA	TT	GG	TT	GG	NN	CT	CT		81
NA10861	AA	AA	AA	GT	CT	CT	GG	AC	CT	AG	CT	AG	NN	CT	CT		82
NA10856	AA	AA	AA	GT	CT	CT	AG	AC	CT	AG	CT	AG	NN	CT	CT		83
NA11881	AG	AG	AG	GT	CT	CT	AG	AC	CT	AG	CT	AG	NN	CT	CT		84
NA11993	AG	AG	AG	GT	CT	CT	AG	AC	CT	AG	CT	AG	NN	CT	CT		85
NA10838	AA	AA	AA	GG	CC	TT	GG	AA	TT	GG	TT	GG	AG	CT	CT		86
NA12044	AA	AA	AA	GG	CC	TT	GG	AA	TT	GG	TT	GG	AG	CT	CT		87
NA12156	AA	AA	AA	GG	CC	TT	GG	AA	TT	GG	TT	GG	AG	CT	CT		88
NA12249	AA	AA	AA	GG	CC	TT	GG	AA	TT	GG	TT	GG	AG	CT	CT		89
NA07348	AG	AG	AG	GG	CC	TT	GG	AA	TT	GG	TT	GG	AG	CT	CT		90
NA10839	AG	AG	AG	GG	CC	TT	GG	AA	TT	GG	TT	GG	AG	CT	CT		91
NA10847	AG	AG	AG	GG	CC	TT	GG	AA	TT	GG	TT	GG	AG	CT	CT		92
NA12146	AG	AG	AG	GG	CC	TT	GG	AA	TT	GG	TT	GG	AG	CT	CT		93
NA12752	AG	AG	AG	GG	CC	TT	GG	AA	TT	GG	TT	GG	AG	CT	CT		94
NA12762	AG	AG	AG	GG	CC	TT	GG	AA	TT	GG	TT	GG	AG	CT	CT		95
NA11995	AA	AA	AA	GG	CC	TT	GG	AA	CT	AG	CT	AG	AG	CT	CT		96
NA11994	AG	AG	AG	GT	CT	CT	GG	AC	CT	AG	CT	AG	AG	CT	CT		97
NA11829	AA	AA	AA	GT	CT	CT	AG	AC	CT	AG	CT	AG	AG	CT	CT		98
NA12043	AA	AA	AA	GT	CT	CT	AG	AC	CT	AG	CT	AG	AG	CT	CT		99
NA12155	AA	AA	AA	GT	CT	CT	AG	AC	CT	AG	CT	AG	AG	CT	CT		100
NA12740	AA	AA	AA	GT	CT	CT	AG	AC	CT	AG	CT	AG	AG	CT	CT		101
NA12801	AA	AA	AA	GT	CT	CT	AG	AC	CT	AG	CT	AG	AG	CT	CT		102
NA12812	AA	AA	AA	GT	CT	CT	AG	AC	CT	AG	CT	AG	AG	CT	CT		103
NA12891	AA	AA	AA	GT	CT	CT	AG	AC	CT	AG	CT	AG	AG	CT	CT		104
NA12892	AG	AA	AA	GT	CT	CT	AG	AC	CT	AG	CT	AG	AG	CT	CT		105
NA12003	AA	AG	AG	GT	CT	CT	AG	AC	CT	AG	CT	AG	AG	CT	CT		106
NA12865	AA	AG	AG	GT	CT	CT	AG	AC	CT	AG	CT	AG	AG	CT	CT		107
NA12874	AA	AG	AG	GT	CT	CT	AG	AC	CT	AG	CT	AG	AG	CT	CT		108
NA07022	AG	AG	AG	GT	CT	CT	AG	AC	CT	AG	CT	AG	AG	CT	CT		109
NA07056	AG	AG	AG	GT	CT	CT	AG	AC	CT	AG	CT	AG	AG	CT	CT		110
NA10854	AG	AG	AG	GT	CT	CT	AG	AC	CT	AG	CT	AG	AG	CT	CT		111
NA11832	AG	AG	AG	GT	CT	CT	AG	AC	CT	AG	CT	AG	AG	CT	CT		112
NA11840	AG	AG	AG	GT	CT	CT	AG	AC	CT	AG	CT	AG	AG	CT	CT		113
NA11992	AG	AG	AG	GT	CT	CT	AG	AC	CT	AG	CT	AG	AG	CT	CT		114
NA12239	AG	AG	AG	GT	CT	CT	AG	AC	CT	AG	CT	AG	AG	CT	CT		115
NA12248	AG	AG	AG	GT	CT	CT	AG	AC	CT	AG	CT	AG	AG	CT	CT		116
NA12707	AG	AG	AG	GT	CT	CT	AG	AC	CT	AG	CT	AG	AG	CT	CT		117
NA12716	AG	AG	AG	GT	CT	CT	AG	AC	CT	AG	CT	AG	AG	CT	CT		118
NA12753	AG	AG	AG	GT	CT	CT	AG	AC	CT	AG	CT	AG	AG	CT	CT		119
NA12760	AG	AG	AG	GT	CT	CT	AG	AC	CT	AG	CT	AG	AG	CT	CT		120
NA12763	AG	AG	AG	GT	CT	CT	AG	AC	CT	AG	CT	AG	AG	CT	CT		121
NA12814	AG	AG	AG	GT	CT	CT	AG	AC	CT	AG	CT	AG	AG	CT	CT		122
NA10843	AA	AA	AA	GG	CC	TT	GG	AA	TT	GG	TT	GG	NN	NN	CT		123
NA11920	AA	AA	AA	GG	CC	TT	GG	AA	TT	GG	TT	GG	NN	NN	CT		124
NA12272	AA	AA	AA	GG	CC	TT	GG	AA	TT	GG	TT	GG	NN	NN	CT		125
NA12283	AA	AA	AA	GG	CC	TT	GG	AA	TT	GG	TT	GG	NN	NN	CT		126
NA12383	AA	AA	AA	GG	CC	TT	GG	AA	TT	GG	TT	GG	NN	NN	CT		127
NA12767	AA	AA	AA	GG	CC	TT	GG	AA	TT	GG	TT	GG	NN	NN	CT		128
NA12776	AA	AA	AA	GG	CC	TT	GG	AA	TT	GG	TT	GG	NN	NN	CT		129
NA12778	AA	AA	AA	GG	CC	TT	GG	AA	TT	GG	TT	GG	NN	NN	CT		130
NA11918	AG	AA	AA	GG	CC	TT	GG	AA	TT	GG	TT	GG	NN	NN	CT		131
NA12336	AG	AG	AG	GG	CC	TT	GG	AA	TT	GG	TT	GG	NN	NN	CT		132
NA07347	AA	AA	AA	GT	CT	CT	AG	AC	CT	AG	CT	AG	NN	NN	CT		133
NA12342	AA	AA	AA	GT	CT	CT	AG	AC	CT	AG	CT	AG	NN	NN	CT		134
NA10853	AA	AG	AG	GT	CT	CT	AG	AC	CT	AG	CT	AG	NN	NN	CT		135
NA10850	AG	AG	AG	GT	CT	CT	AG	AC	CT	AG	CT	AG	NN	NN	CT		136
NA10852	AG	AG	AG	GT	CT	CT	AG	AC	CT	AG	CT	AG	NN	NN	CT		137
NA11892	AG	AG	AG	GT	CT	CT	AG	AC	CT	AG	CT	AG	NN	NN	CT		138
NA11917	AG	AG	AG	GT	CT	CT	AG	AC	CT	AG	CT	AG	NN	NN	CT		139
NA11919	AG	AG	AG	GT	CT	CT	AG	AC	CT	AG	CT	AG	NN	NN	CT		140
NA11930	AG	AG	AG	GT	CT	CT	AG	AC	CT	AG	CT	AG	NN	NN	CT		141
NA12375	AG	AG	AG	GT	CT	CT	AG	AC	CT	AG	CT	AG	NN	NN	CT		142
NA12376	AG	AG	AG	GT	CT	CT	AG	AC	CT	AG	CT	AG	NN	NN	CT		143
NA12718	AG	AG	AG	GT	CT	CT	AG	AC	CT	AG	CT	AG	NN	NN	CT		144
NA12775	AG	AG	AG	GT	CT	CT	AG	AC	CT	AG	CT	AG	NN	NN	CT		145
NA06986	AG	AG	AG	GT	CT	CT	AG	AC	CT	AG	CT	AG	NN	NN	TT		1
NA11891	AG	AG	AG	GT	CT	CT	AG	AC	CT	AG	CT	AG	NN	NN	TT		2
NA12708	AG	AG	AG	GT	CT	CT	AG	AC	CT	AG	CT	AG	NN	NN	TT		3
NA12005	AA	AA	AA	GG	CC	TT	GG	AA	TT	GG	TT	GG	NN	TT	TT		4
NA10831	AA	AA	AA	GT	CT	CT	AG	AC	CT	AG	CT	AG	AA	TT	TT		5
NA10855	AA	AA	AA	GT	CT	CT	AG	AC	CT	AG	CT	AG	AA	TT	TT		6
NA11831	AG	AG	AG	GT	CT	CT	AG	AC	CT	AG	CT	AG	AA	TT	TT		7
NA12878	AG	AA	AA	TT	TT	CC	AA	CC	CC	AA	CC	AA	AG	CT	CT		8
NA12286	AG	AG	AG	TT	TT	NN	AA	CC	CC	AA	CC	AA	NN	NN	TT		9
NA12751	AG	AG	AG	TT	TT	CC	AA	CC	CC	AA	CC	AA	AA	TT	TT		10
NA12889	AG	AG	AG	TT	TT	CC	AG	CC	CC	AG	CC	AG	NN	NN	CT		11
NA06985	AG	GG	GG	GT	CT	CT	AG	AC	CT	AG	CT	AG	AG	CT	CT		12
NA06997	GG	GG	GG	GT	CT	CT	AG	AC	CT	AG	CT	AG	NN	NN	CT		13
NA10840	GG	GG	GG	TT	TT	CC	AA	CC	CC	AA	CC	AA	NN	NN	TT		14
NA10865	GG	GG	GG	TT	TT	NN	AA	CC	CC	AA	CC	AA	NN	NN	TT		15
NA12287	GG	GG	GG	TT	TT	CT	AA	CC	CC	AA	CC	AA	NN	NN	TT		16
NA12343	GG	AG	AG	GG	CC	TT	GG	AA	TT	GG	TT	GG	NN	NN	TT		17
NA12413	GG	GG	GG	GT	CT	NN	AG	AC	CT	AG	CT	AG	NN	NN	CT		18
NA12546	GG	GG	GG	GT	CT	CT	AG	AC	CT	AG	CT	AG	NN	NN	CT		19
NA12761	GG	GG	GG	GT	CT	CT	AG	AC	CT	AG	CT	AG	AA	TT	TT		20
NA07019	NN	NN	NN	NN	NN	NN	NN	NN	NN	NN	NN	NN	AG	CT	NN
NA07034	NN	NN	NN	NN	NN	NN	NN	NN	NN	NN	NN	NN	AG	CT	NN
NA07048	NN	NN	NN	NN	NN	NN	NN	NN	NN	NN	NN	NN	AG	CT	NN
NA10851	NN	NN	NN	NN	NN	NN	NN	NN	NN	NN	NN	NN	GG	CC	NN
NA10857	NN	NN	NN	NN	NN	NN	NN	NN	NN	NN	NN	NN	AG	CT	NN
NA10860	NN	NN	NN	NN	NN	NN	NN	NN	NN	NN	NN	NN	NN	CT	NN
NA12004	NN	NN	NN	NN	NN	NN	NN	NN	NN	NN	NN	NN	AG	CT	NN
NA12236	NN	NN	NN	NN	NN	NN	NN	NN	NN	NN	NN	NN	GG	CC	NN
NA12717	NN	NN	NN	NN	NN	NN	NN	NN	NN	NN	NN	NN	GG	CC	NN

## Sheet: S4_CHB
Table S4 Genotypes for available SNPs corresponding to the 23-SNP pattern for the CHB individuals in the HapMap data.
rs#	rs10409851	rs4806874	rs10415622	rs12608998	rs8105402	rs7008	rs2238614	rs1860938	rs2110118	rs4807330	rs1640262	rs1736192	rs1736181	rs1640271
alleles	A/G	A/G	A/G	G/T	C/T	C/T	A/G	A/C	C/T	A/G	C/T	A/G	C/T	C/T
chrom	chr19	chr19	chr19	chr19	chr19	chr19	chr19	chr19	chr19	chr19	chr19	chr19	chr19	chr19		CHB
pos	2677199	2689352	2690696	2704270	2704983	2705978	2706339	2711878	2726144	2728662	2730134	2735678	2748703	2750979		Carrier Frequency =		0.50365
NA18577	AA	AA	AA	GG	CC	TT	GG	AA	TT	GG	TT	GG	CC	CC		1
NA18593	AA	AA	AA	GG	CC	TT	GG	AA	TT	GG	TT	GG	CC	CC		2
NA18636	AA	AA	AA	GG	CC	TT	GG	AA	TT	GG	TT	GG	CC	CC		3
NA18563	AG	AG	AG	GT	CT	CT	GG	AC	CT	GG	CT	GG	CT	CC		4
NA18571	AG	AG	AG	GT	CT	CT	GG	AC	CT	GG	CT	GG	CT	CC		5
NA18579	AG	AG	AG	GT	CT	CT	GG	AC	CT	GG	CT	GG	CT	CC		6
NA18544	AA	AA	AA	GG	CC	TT	GG	AA	TT	GG	TT	GG	NN	CC		7
NA18557	AA	AA	AA	GG	CC	TT	GG	AA	TT	GG	TT	GG	NN	CC		8
NA18617	AA	AA	AA	GG	CC	TT	GG	AA	TT	GG	TT	GG	NN	CC		9
NA18638	AA	AA	AA	GG	CC	TT	GG	AA	TT	GG	TT	GG	NN	CC		10
NA18639	AA	AA	AA	GG	CC	TT	GG	AA	TT	GG	TT	GG	NN	CC		11
NA18757	AA	AA	AA	GG	CC	TT	GG	AA	TT	GG	TT	GG	NN	CC		12
NA18763	AA	AA	AA	GG	CC	TT	GG	AA	TT	GG	TT	GG	NN	CC		13
NA18777	AA	AA	AA	GG	CC	TT	GG	AA	TT	GG	TT	GG	NN	CC		14
NA18798	AA	AA	AA	GG	CC	TT	GG	AA	TT	GG	TT	GG	NN	CC		15
NA18531	AG	AA	AA	GG	CC	TT	GG	AA	TT	GG	TT	GG	NN	CC		16
NA18614	AG	AA	AA	GG	CC	TT	GG	AA	TT	GG	TT	GG	NN	CC		17
NA18539	AG	AG	AG	GG	CC	TT	GG	AA	TT	GG	TT	GG	NN	CC		18
NA18613	AG	AG	AG	GG	CC	TT	GG	AA	TT	GG	TT	GG	NN	CC		19
NA18619	AG	AA	AA	GT	CT	CT	GG	AA	CT	GG	CT	GG	NN	CC		20
NA18627	AA	AG	AG	GT	CT	CT	GG	AC	CT	GG	CT	GG	NN	CC		21
NA18595	AG	AG	AG	GT	CT	CT	GG	AC	CT	GG	CT	GG	NN	CC		22
NA18597	AG	AG	AG	GT	CT	CT	GG	AC	CT	GG	CT	GG	NN	CC		23
NA18599	AG	AG	AG	GT	CT	CT	GG	AC	CT	GG	CT	GG	NN	CC		24
NA18643	AG	AG	AG	GT	CT	CT	GG	AC	CT	GG	CT	GG	NN	CC		25
NA18778	AG	AG	AG	GT	CT	CT	GG	AC	CT	GG	CT	GG	NN	CC		26
NA18760	AA	AG	AG	GT	CT	CT	GG	NN	CT	GG	CT	GG	NN	CC		27
NA18562	AA	AA	AA	GT	CT	CT	AG	AC	CT	AG	CT	AG	CT	CT		28
NA18592	AA	AA	AA	GT	CT	CT	AG	AC	CT	AG	CT	AG	CT	CT		29
NA18537	AG	AA	AA	GT	CT	CT	AG	AC	CT	AG	CT	AG	CT	CT		30
NA18526	AG	AG	AG	GT	CT	CT	AG	AC	CT	AG	CT	AG	CT	CT		31
NA18529	AG	AG	AG	GT	CT	CT	AG	AC	CT	AG	CT	AG	CT	CT		32
NA18542	AG	AG	AG	GT	CT	CT	AG	AC	CT	AG	CT	AG	CT	CT		33
NA18545	AG	AG	AG	GT	CT	CT	AG	AC	CT	AG	CT	AG	CT	CT		34
NA18552	AG	AG	AG	GT	CT	CT	AG	AC	CT	AG	CT	AG	CT	CT		35
NA18566	AG	AG	AG	GT	CT	CT	AG	AC	CT	AG	CT	AG	CT	CT		36
NA18570	AG	AG	AG	GT	CT	CT	AG	AC	CT	AG	CT	AG	CT	CT		37
NA18573	AG	AG	AG	GT	CT	CT	AG	AC	CT	AG	CT	AG	CT	CT		38
NA18609	AG	AG	AG	GT	CT	CT	AG	AC	CT	AG	CT	AG	CT	CT		39
NA18620	AG	AG	AG	GT	CT	CT	AG	AC	CT	AG	CT	AG	CT	CT		40
NA18637	AG	AG	AG	GT	CT	CT	AG	AC	CT	AG	CT	AG	CT	CT		41
NA18761	AG	AG	AG	GT	CT	CT	GG	AC	CT	AG	CT	AG	NN	CT		42
NA18762	AA	AA	AA	GT	CT	CT	AG	AC	CT	AG	CT	AG	NN	CT		43
NA18792	AA	AG	AG	GT	CT	CT	AG	AC	CT	AG	CT	AG	NN	CT		44
NA18533	AG	AG	AG	GT	CT	CT	AG	AC	CT	AG	CT	AG	NN	CT		45
NA18538	AG	AG	AG	GT	CT	CT	AG	AC	CT	AG	CT	AG	NN	CT		46
NA18541	AG	AG	AG	GT	CT	CT	AG	AC	CT	AG	CT	AG	NN	CT		47
NA18543	AG	AG	AG	GT	CT	CT	AG	AC	CT	AG	CT	AG	NN	CT		48
NA18560	AG	AG	AG	GT	CT	CT	AG	AC	CT	AG	CT	AG	NN	CT		49
NA18567	AG	AG	AG	GT	CT	CT	AG	AC	CT	AG	CT	AG	NN	CT		50
NA18568	AG	AG	AG	GT	CT	CT	AG	AC	CT	AG	CT	AG	NN	CT		51
NA18626	AG	AG	AG	GT	CT	CT	AG	AC	CT	AG	CT	AG	NN	CT		52
NA18629	AG	AG	AG	GT	CT	CT	AG	AC	CT	AG	CT	AG	NN	CT		53
NA18631	AG	AG	AG	GT	CT	CT	AG	AC	CT	AG	CT	AG	NN	CT		54
NA18634	AG	AG	AG	GT	CT	CT	AG	AC	CT	AG	CT	AG	NN	CT		55
NA18641	AG	AG	AG	GT	CT	CT	AG	AC	CT	AG	CT	AG	NN	CT		56
NA18742	AG	AG	AG	GT	CT	CT	AG	AC	CT	AG	CT	AG	NN	CT		57
NA18747	AG	AG	AG	GT	CT	CT	AG	AC	CT	AG	CT	AG	NN	CT		58
NA18748	AG	AG	AG	GT	CT	CT	AG	AC	CT	AG	CT	AG	NN	CT		59
NA18749	AG	AG	AG	GT	CT	CT	AG	AC	CT	AG	CT	AG	NN	CT		60
NA18751	AG	AG	AG	GT	CT	CT	AG	AC	CT	AG	CT	AG	NN	CT		61
NA18758	AG	AG	AG	GT	CT	CT	AG	AC	CT	AG	CT	AG	NN	CT		62
NA18765	AG	AG	AG	GT	CT	CT	AG	AC	CT	AG	CT	AG	NN	CT		63
NA18769	AG	AG	AG	GT	CT	CT	AG	AC	CT	AG	CT	AG	NN	CT		64
NA18772	AG	AG	AG	GT	CT	CT	AG	AC	CT	AG	CT	AG	NN	CT		65
NA18774	AG	AG	AG	GT	CT	CT	AG	AC	CT	AG	CT	AG	NN	CT		66
NA18780	AG	AG	AG	GT	CT	CT	AG	AC	CT	AG	CT	AG	NN	CT		67
NA18795	AG	AG	AG	GT	CT	CT	AG	AC	CT	AG	CT	AG	NN	CT		68
NA18790	AG	AG	AG	GT	CT	CT	AG	NN	CT	AG	CT	AG	NN	CT		69
NA18648	AG	AG	AG	GT	CT	CT	AG	AC	CT	AG	CT	AG	NN	TT		1
NA18572	AG	AG	AG	GT	CT	CT	AG	AC	CT	AG	CT	AG	TT	TT		2
NA18633	AG	AG	AG	GT	CT	CT	AG	AC	CC	AG	CC	GG	CT	CC		3
NA18618	AG	AG	AG	GT	CT	CC	AG	AC	CT	AG	CT	AG	NN	CT		4
NA18534	AA	AA	AA	TT	TT	CC	AG	AC	CC	AG	CC	AG	NN	CC		5
NA18532	AG	AG	AG	TT	TT	CC	AA	CC	CC	AA	CC	AA	TT	TT		6
NA18594	AG	AG	AG	TT	TT	CC	AA	CC	CC	AA	CC	AA	TT	TT		7
NA18740	AG	AG	AG	TT	TT	CC	AG	CC	CC	AG	CC	AG	NN	CT		8
NA18745	AG	AG	AG	TT	TT	CC	AA	CC	CC	AA	CC	AA	NN	TT		9
NA18750	AG	AG	AG	TT	TT	CC	AA	CC	CC	AA	CC	AA	NN	TT		10
NA18773	AG	AG	AG	TT	TT	CC	AG	CC	CC	AG	CC	AG	NN	CT		11
NA18596	AA	GG	GG	TT	TT	CC	AA	CC	CC	AA	CC	AA	NN	TT		12
NA18616	AA	GG	GG	TT	TT	CC	AG	CC	CC	AG	CC	AG	NN	CT		13
NA18525	AG	GG	GG	TT	TT	CC	AA	CC	CC	AA	CC	AA	NN	TT		14
NA18561	AG	GG	GG	GT	CT	CC	AG	AC	CT	AG	CT	AG	CT	CT		15
NA18576	AG	GG	GG	TT	TT	CC	AA	CC	CC	AA	CC	AA	TT	TT		16
NA18582	AG	GG	GG	TT	TT	NN	AG	CC	CC	AG	CC	AG	TT	CT		17
NA18628	AG	GG	GG	TT	TT	CC	AA	CC	CC	AA	CC	AA	NN	TT		18
NA18524	GG	GG	GG	TT	TT	CC	AA	CC	CC	AA	CC	AA	TT	TT		19
NA18527	GG	GG	GG	TT	TT	CC	AA	CC	CC	AA	CC	AA	NN	TT		20
NA18528	GG	GG	GG	TT	TT	CC	AA	CC	CC	AA	CC	AA	NN	TT		21
NA18536	GG	AA	AA	GT	CT	CT	AG	AC	CT	AG	CT	AG	NN	CT		22
NA18546	GG	GG	GG	TT	TT	CC	AG	CC	CC	AG	CC	AG	NN	CT		23
NA18548	GG	AG	AG	GT	CT	CT	AG	AC	CT	AG	CT	AG	NN	CT		24
NA18550	GG	GG	GG	TT	TT	CC	AA	CC	CC	AA	CC	AA	TT	TT		25
NA18553	GG	GG	GG	TT	TT	CC	AA	CC	CC	AA	CC	AA	NN	TT		26
NA18555	GG	GG	GG	TT	TT	CC	AG	CC	CC	AG	CC	AG	TT	CT		27
NA18558	GG	GG	GG	TT	TT	CC	AA	CC	CC	AA	CC	AA	TT	TT		28
NA18559	GG	GG	GG	TT	TT	CC	AA	CC	CC	AA	CC	AA	NN	TT		29
NA18564	GG	GG	GG	TT	TT	CC	AA	CC	CC	AA	CC	AA	CT	CT		30
NA18569	GG	GG	GG	TT	TT	CC	AG	CC	CC	AG	CC	AG	NN	CT		31
NA18580	GG	GG	GG	TT	TT	CC	AA	CC	CC	AA	CC	AA	NN	TT		32
NA18583	GG	GG	GG	TT	TT	CC	AG	CC	CC	AG	CC	AG	NN	CT		33
NA18591	GG	GG	GG	TT	TT	CC	AA	CC	CC	AA	CC	AA	NN	TT		34
NA18602	GG	GG	GG	TT	TT	CC	AA	CC	CC	AA	CC	AA	NN	TT		35
NA18603	GG	GG	GG	TT	TT	CC	AA	CC	CC	AA	CC	AA	TT	CT		36
NA18605	GG	GG	GG	TT	TT	CC	AG	CC	CC	AG	CC	AG	TT	CT		37
NA18608	GG	GG	GG	TT	TT	CC	AA	CC	CC	AA	CC	AA	TT	TT		38
NA18610	GG	GG	GG	TT	TT	CC	AA	CC	CC	AA	CC	AA	NN	TT		39
NA18611	GG	GG	GG	TT	TT	CC	AA	CC	CC	AA	CC	AA	CT	TT		40
NA18612	GG	GG	GG	TT	TT	CC	AA	CC	CC	AA	CC	AA	TT	TT		41
NA18615	GG	GG	GG	GT	CT	CT	AG	AC	CT	AG	CT	AG	NN	CT		42
NA18621	GG	GG	GG	TT	TT	CC	AA	CC	CC	AA	CC	AA	TT	TT		43
NA18622	GG	GG	GG	TT	TT	CC	AG	CC	CC	AG	CC	AG	TT	CT		44
NA18623	GG	AA	AA	GG	CC	TT	GG	AA	TT	GG	TT	GG	CC	CC		45
NA18624	GG	GG	GG	TT	TT	CC	AG	CC	CC	AG	CC	AG	TT	CT		46
NA18630	GG	GG	GG	TT	TT	CC	AA	CC	CC	AA	CC	AA	NN	TT		47
NA18632	GG	AG	AG	GT	CT	CT	AG	AC	CT	AG	CT	AG	CT	CT		48
NA18635	GG	GG	GG	GT	CT	CT	AG	AC	CT	AG	CT	AG	CT	CT		49
NA18640	GG	AG	AG	GT	CT	CT	AG	AC	CT	AG	CT	AG	NN	CT		50
NA18642	GG	GG	GG	TT	TT	CC	AA	CC	CC	AA	CC	AA	NN	CT		51
NA18644	GG	GG	GG	TT	TT	CC	AG	CC	CC	AG	CC	AG	NN	CT		52
NA18645	GG	GG	GG	TT	TT	CC	AA	CC	CC	AA	CC	AA	NN	TT		53
NA18647	GG	AG	AG	TT	TT	CC	AA	CC	CC	AA	CC	AA	NN	TT		54
NA18649	GG	GG	GG	TT	TT	CC	AA	CC	CC	AA	CC	AA	NN	TT		55
NA18739	GG	GG	GG	TT	TT	CC	AA	CC	CC	AA	CC	AA	NN	TT		56
NA18741	GG	AG	AG	TT	TT	CC	AA	CC	CC	AA	CC	AA	NN	TT		57
NA18743	GG	GG	GG	TT	TT	CC	AA	CC	CC	AA	CC	AA	NN	TT		58
NA18752	GG	GG	GG	TT	TT	CC	AA	CC	CC	AA	CC	AA	NN	TT		59
NA18755	GG	GG	GG	TT	TT	CC	AA	CC	CC	AA	CC	AA	NN	TT		60
NA18759	GG	GG	GG	TT	TT	CC	AA	CC	CC	AA	CC	AA	NN	TT		61
NA18771	GG	GG	GG	TT	TT	CC	AA	CC	CC	AA	CC	AA	NN	TT		62
NA18779	GG	GG	GG	TT	TT	CC	AG	CC	CC	AG	CC	AG	NN	CT		63
NA18783	GG	GG	GG	TT	TT	CC	AA	CC	CC	AA	CC	AA	NN	TT		64
NA18784	GG	AG	AG	TT	TT	CC	AA	CC	CC	AA	CC	AA	NN	TT		65
NA18785	GG	GG	GG	TT	TT	CC	AG	CC	CC	AG	CC	AG	NN	CT		66
NA18787	GG	GG	GG	TT	TT	CC	AA	CC	CC	AA	CC	AA	NN	TT		67
NA18794	GG	GG	GG	TT	TT	CC	AG	CC	CC	AG	CC	AG	NN	CC		68
NA18540	NN	NN	NN	NN	NN	NN	NN	NN	NN	NN	NN	NN	CT	NN
NA18547	NN	NN	NN	NN	NN	NN	NN	NN	NN	NN	NN	NN	TT	NN

## Sheet: S5_CHD
Table S5 Genotypes for available SNPs corresponding to the 23-SNP pattern for the CHD individuals in the HapMap data.
rs#	rs10409851	rs4806874	rs10415622	rs12608998	rs8105402	rs7008	rs2238614	rs1860938	rs2110118	rs4807330	rs1640262	rs1736192	rs1640271
alleles	A/G	A/G	A/G	G/T	C/T	C/T	A/G	A/C	C/T	A/G	C/T	A/G	C/T
chrom	chr19	chr19	chr19	chr19	chr19	chr19	chr19	chr19	chr19	chr19	chr19	chr19	chr19		CHD
pos	2677199	2689352	2690696	2704270	2704983	2705978	2706339	2711878	2726144	2728662	2730134	2735678	2750979		Carrier Frequency =		0.46789
NA17981	AA	AA	AA	GG	CC	TT	GG	AA	TT	GG	TT	GG	CC		1
NA18106	AA	AA	AA	GG	CC	TT	GG	AA	TT	GG	TT	GG	CC		2
NA18122	AA	AA	AA	GG	CC	TT	GG	AA	TT	GG	TT	GG	CC		3
NA18161	AA	AA	AA	GG	CC	TT	GG	AA	TT	GG	TT	GG	CC		4
NA18117	AA	AA	AA	GG	CC	TT	GG	AA	TT	GG	TT	GG	CC		5
NA18151	AA	AA	AA	GG	CC	TT	GG	AA	TT	GG	TT	GG	CC		6
NA17979	AA	AA	AA	GG	CC	TT	GG	AA	TT	GG	TT	GG	CC		7
NA18682	AA	AA	AA	GG	CC	TT	GG	AA	TT	GG	TT	GG	CC		8
NA18706	AA	AA	AA	GG	CC	TT	GG	AA	TT	GG	TT	GG	CC		9
NA18695	AA	AA	AA	GG	CC	TT	GG	AA	TT	GG	TT	GG	CC		10
NA18155	AG	AA	AA	GG	CC	TT	GG	AA	TT	GG	TT	GG	CC		11
NA18157	AG	AA	AA	GG	CC	TT	GG	AA	TT	GG	TT	GG	CC		12
NA17977	AG	AG	AG	GT	CT	CT	GG	AC	CT	GG	CT	GG	CC		13
NA17989	AG	AG	AG	GT	CT	CT	GG	AC	CT	GG	CT	GG	CC		14
NA18128	AG	AG	AG	GT	CT	CT	GG	AC	CT	GG	CT	GG	CC		15
NA18141	AG	AG	AG	GT	CT	CT	GG	AC	CT	GG	CT	GG	CC		16
NA18153	AG	AG	AG	GT	CT	CT	GG	AC	CT	GG	CT	GG	CC		17
NA18679	AG	AG	AG	GT	CT	CT	GG	AC	CT	GG	CT	GG	CC		18
NA18686	AG	AG	AG	GT	CT	CT	GG	AC	CT	GG	CT	GG	CC		19
NA18120	AA	AA	AA	GG	CC	TT	GG	AA	TT	GG	TT	AG	CT		20
NA18145	AA	AA	AA	GG	CC	TT	GG	AA	TT	GG	TT	AG	CT		21
NA18112	AG	AG	AG	GT	CT	NN	AG	AC	CT	AG	CT	AG	CT		22
NA18101	AA	AA	AA	GT	CT	CT	AG	AC	CT	AG	CT	AG	CT		23
NA17986	AA	AA	AA	GT	CT	CT	AG	AC	CT	AG	CT	AG	CT		24
NA18124	AA	AA	AA	GT	CT	CT	AG	AC	CT	AG	CT	AG	CT		25
NA18674	AA	AA	AA	GT	CT	CT	AG	AC	CT	AG	CT	AG	CT		26
NA17974	AG	AA	AA	GT	CT	CT	AG	AC	CT	AG	CT	AG	CT		27
NA18118	AA	AA	AG	GT	CT	CT	AG	AC	CT	AG	CT	AG	CT		28
NA18109	AG	AG	AG	GT	CT	CT	AG	AC	CT	AG	CT	AG	CT		29
NA18129	AG	AG	AG	GT	CT	CT	AG	AC	CT	AG	CT	AG	CT		30
NA18150	AG	AG	AG	GT	CT	CT	AG	AC	CT	AG	CT	AG	CT		31
NA17997	AG	AG	AG	GT	CT	CT	AG	AC	CT	AG	CT	AG	CT		32
NA17998	AG	AG	AG	GT	CT	CT	AG	AC	CT	AG	CT	AG	CT		33
NA18696	AG	AG	AG	GT	CT	CT	AG	AC	CT	AG	CT	AG	CT		34
NA17965	AG	AG	AG	GT	CT	CT	AG	AC	CT	AG	CT	AG	CT		35
NA17983	AG	AG	AG	GT	CT	CT	AG	AC	CT	AG	CT	AG	CT		36
NA18125	AG	AG	AG	GT	CT	CT	AG	AC	CT	AG	CT	AG	CT		37
NA17990	AG	AG	AG	GT	CT	CT	AG	AC	CT	AG	CT	AG	CT		38
NA18160	AG	AG	AG	GT	CT	CT	AG	AC	CT	AG	CT	AG	CT		39
NA18689	AG	AG	AG	GT	CT	CT	AG	AC	CT	AG	CT	AG	CT		40
NA18685	AG	AG	AG	GT	CT	CT	AG	AC	CT	AG	CT	AG	CT		41
NA17962	AG	AG	AG	GT	CT	CT	AG	AC	CT	AG	CT	AG	CT		42
NA17966	AG	AG	AG	GT	CT	CT	AG	AC	CT	AG	CT	AG	CT		43
NA17968	AG	AG	AG	GT	CT	CT	AG	AC	CT	AG	CT	AG	CT		44
NA17995	AG	AG	AG	GT	CT	CT	AG	AC	CT	AG	CT	AG	CT		45
NA18133	AG	AG	AG	GT	CT	CT	AG	AC	CT	AG	CT	AG	CT		46
NA18136	AG	AG	AG	GT	CT	CT	AG	AC	CT	AG	CT	AG	CT		47
NA18671	AG	AG	AG	GT	CT	CT	AG	AC	CT	AG	CT	AG	CT		48
NA18119	AG	AG	AG	GT	CT	CT	AG	AC	CT	AG	CT	AG	CT		49
NA18708	AG	AG	AG	GT	CT	CT	AG	AC	CT	AG	CT	AG	CT		50
NA17982	AG	AG	AG	GT	CT	CT	AG	NN	CT	AG	CT	AG	CT		51
NA18162	AG	AG	AG	GT	CT	CT	AG	AC	CT	AG	CT	AA	TT		1
NA17993	AG	AG	AG	GT	CT	CT	AG	AC	CC	AA	CC	AG	CT		2
NA18704	AG	AG	AG	GT	CT	CC	AG	AC	CT	AG	CT	AG	CT		3
NA18684	AG	AG	AG	GT	CT	CC	AG	AC	CT	AG	CT	AG	CT		4
NA18134	AA	AA	AG	TT	TT	CC	AG	AC	CC	AG	CC	AG	CT		5
NA18104	AG	AA	AG	TT	TT	CC	AA	CC	CC	AA	CC	AA	CT		6
NA17996	AA	AG	AG	TT	TT	NN	AA	CC	CC	AA	CC	AA	TT		7
NA18105	AG	AG	AG	TT	TT	CC	AA	CC	CC	AA	CC	AA	TT		8
NA18139	AG	AG	AG	TT	TT	CC	AA	CC	CC	AA	CC	AA	TT		9
NA17975	AG	AG	AG	TT	TT	NN	AA	CC	CC	AA	CC	AA	TT		10
NA18114	AG	AG	AG	TT	TT	CC	AA	CC	CC	AA	CC	AA	TT		11
NA18108	AG	AG	AG	TT	TT	CC	AA	CC	CC	AA	CC	AA	TT		12
NA18670	AG	AG	AG	TT	TT	CC	AA	CC	CC	AA	CC	AA	TT		13
NA18127	AG	AG	AG	TT	TT	CC	AA	CC	CC	AA	CC	AA	CT		14
NA18166	AG	AG	AG	TT	TT	CC	AA	CC	CC	AA	CC	AA	TT		15
NA18140	AG	AG	AG	TT	TT	CC	AA	CC	CC	AA	CC	AA	TT		16
NA18699	AG	AG	AG	TT	TT	CC	AG	AC	CC	AG	CC	AG	CT		17
NA18135	AG	GG	GG	TT	TT	CC	AA	CC	CC	AA	CC	AA	TT		18
NA17967	AG	GG	GG	TT	TT	CC	AG	CC	CC	AG	CC	AG	CT		19
NA17999	AG	GG	GG	TT	TT	CC	AG	CC	CC	AG	CC	AG	CT		20
NA18131	AG	GG	GG	TT	TT	CC	AG	CC	CC	AG	CC	AG	CT		21
NA18113	AG	GG	GG	TT	TT	CC	AA	CC	CC	AA	CC	AA	TT		22
NA18164	AG	GG	GG	TT	TT	CC	AG	CC	CC	AG	CC	AG	CT		23
NA17970	GG	AG	AG	GT	CT	CT	AG	AC	CT	AG	CT	AG	CT		24
NA18144	GG	GG	GG	TT	TT	CC	AG	CC	CC	AG	CC	AG	CC		25
NA18154	GG	GG	GG	TT	TT	CC	AG	CC	CC	AG	CC	AG	CT		26
NA17980	GG	GG	GG	TT	TT	CC	AA	CC	CC	AA	CC	AA	TT		27
NA18138	GG	GG	GG	TT	TT	CC	AA	AC	CC	AA	CC	AA	TT		28
NA18149	GG	GG	GG	TT	TT	CC	GG	CC	CC	GG	CC	GG	CC		29
NA17987	GG	GG	GG	TT	TT	CC	AA	CC	CC	AA	CC	AA	TT		30
NA17988	GG	GG	GG	TT	TT	CC	AG	CC	CC	AG	CC	AG	CT		31
NA18107	GG	AG	AG	GT	CT	CT	AG	AC	CT	AG	CT	AG	CT		32
NA18146	GG	GG	GG	TT	TT	CC	GG	CC	CC	AG	CC	AG	CT		33
NA18148	GG	GG	GG	TT	TT	CC	AA	CC	CC	AA	CC	AA	TT		34
NA18694	GG	GG	GG	TT	TT	CC	AA	CC	CC	AA	CC	AA	TT		35
NA17969	GG	GG	GG	TT	TT	CC	AA	CC	CC	AA	CC	AA	CT		36
NA18132	GG	GG	GG	TT	TT	CC	AA	CC	CC	AA	CC	AA	TT		37
NA18143	GG	GG	GG	TT	TT	CC	AA	CC	CC	AA	CC	AA	TT		38
NA18147	GG	GG	GG	TT	TT	CC	AA	CC	CC	AA	CC	AA	TT		39
NA18158	GG	AG	AG	TT	TT	CC	AA	CC	CC	AA	CC	AA	TT		40
NA18702	GG	GG	GG	TT	TT	CC	AG	CC	CC	AG	CC	AG	CT		41
NA17976	GG	GG	GG	TT	TT	NN	AA	CC	CC	AA	CC	AA	TT		42
NA18156	GG	GG	GG	TT	TT	CC	AA	CC	CC	AA	CC	AA	TT		43
NA18152	GG	GG	GG	TT	TT	CC	AA	CC	CC	AA	CC	AA	TT		44
NA18159	GG	GG	GG	TT	TT	CC	AA	CC	CC	AA	CC	AA	CT		45
NA17972	GG	AG	AG	GT	CT	CT	AG	AC	CT	AG	CT	AG	CT		46
NA18102	GG	GG	GG	TT	TT	CC	AA	CC	CC	AA	CC	AA	TT		47
NA17978	GG	GG	GG	TT	TT	CC	AA	CC	CC	AA	CC	AA	CT		48
NA18116	GG	GG	GG	TT	TT	CC	AG	CC	CC	AG	CC	AG	CT		49
NA18126	GG	GG	GG	TT	TT	CC	AG	CC	CC	AG	CC	AG	CT		50
NA18683	GG	GG	GG	TT	TT	CC	AA	CC	CC	AA	CC	AA	TT		51
NA18669	GG	GG	GG	TT	TT	CC	AA	CC	CC	AA	CC	AA	TT		52
NA18675	GG	GG	GG	TT	TT	CC	AA	CC	CC	AA	CC	AA	TT		53
NA18690	GG	GG	GG	TT	TT	CC	AA	CC	CC	AG	CC	AA	TT		54
NA18701	GG	GG	GG	TT	TT	CC	GG	CC	CC	GG	CC	GG	CC		55
NA18123	GG	GG	GG	TT	TT	CC	AA	CC	CC	AA	CC	AA	TT		56
NA18692	GG	GG	GG	TT	TT	CC	AG	CC	CC	AG	CC	AG	CC		57
NA18697	GG	GG	GG	TT	TT	CC	AA	CC	CC	AA	CC	AA	TT		58

## Sheet: S6_GIH
Table S6 Genotypes for available SNPs corresponding to the 23-SNP pattern for the GIH individuals in the HapMap data.
rs#	rs10409851	rs4806874	rs10415622	rs12608998	rs8105402	rs7008	rs2238614	rs1860938	rs2110118	rs4807330	rs1640262	rs1736192	rs1640271
alleles	A/G	A/G	A/G	G/T	C/T	C/T	A/G	A/C	C/T	A/G	C/T	A/G	C/T
chrom	chr19	chr19	chr19	chr19	chr19	chr19	chr19	chr19	chr19	chr19	chr19	chr19	chr19		GIH
pos	2677199	2689352	2690696	2704270	2704983	2705978	2706339	2711878	2726144	2728662	2730134	2735678	2750979		Carrier Frequency =		0.752475
NA20849	AA	AA	AA	GG	CC	TT	GG	AA	TT	GG	TT	GG	CC		1
NA20851	AA	AA	AA	GG	CC	TT	GG	AA	TT	GG	TT	GG	CC		2
NA21104	AA	AA	AA	GG	CC	TT	GG	AA	TT	GG	TT	GG	CC		3
NA21086	AA	AA	AA	GG	CC	TT	GG	AA	TT	GG	TT	GG	CC		4
NA21106	AA	AA	AA	GG	CC	TT	GG	AA	TT	GG	TT	GG	CC		5
NA20901	AA	AA	AA	GG	CC	TT	GG	AA	TT	GG	TT	GG	CC		6
NA21090	AA	AA	AA	GG	CC	TT	GG	AA	TT	GG	TT	GG	CC		7
NA21092	AA	AA	AA	GG	CC	TT	GG	AA	TT	GG	TT	GG	CC		8
NA21105	AA	AA	AA	GG	CC	TT	GG	AA	TT	GG	TT	GG	CC		9
NA21109	AA	AA	AA	GG	CC	TT	GG	AA	TT	GG	TT	GG	CC		10
NA20888	AA	AA	AA	GG	CC	TT	GG	AA	TT	GG	TT	GG	CC		11
NA20852	AA	AA	AA	GG	CC	TT	GG	AA	TT	GG	TT	GG	CC		12
NA20858	AA	AA	AA	GG	CC	TT	GG	AA	TT	GG	TT	GG	CC		13
NA20911	AA	AA	AA	GG	CC	TT	GG	AA	TT	GG	TT	GG	CC		14
NA21099	AA	AA	AA	GG	CC	TT	GG	AA	TT	GG	TT	GG	CC		15
NA20862	AA	AA	AA	GG	CC	TT	GG	AA	TT	GG	TT	GG	CC		16
NA21143	AA	AA	AA	GG	CC	TT	GG	AA	TT	GG	TT	GG	CC		17
NA21123	AA	AA	AA	GG	CC	TT	GG	AA	TT	GG	TT	GG	CC		18
NA20874	AA	AA	AA	GG	CC	TT	GG	AA	TT	GG	TT	GG	CC		19
NA20879	AA	AA	AA	GG	CC	TT	GG	AA	TT	GG	TT	GG	CC		20
NA20899	AA	AA	AA	GG	CC	TT	GG	AA	TT	GG	TT	GG	CC		21
NA20875	AA	AA	AA	GG	CC	TT	GG	AA	TT	GG	TT	GG	CC		22
NA20877	AA	AA	AA	GG	CC	TT	GG	AA	TT	GG	TT	GG	CC		23
NA20867	AA	AA	AA	GG	CC	TT	GG	AA	TT	GG	TT	GG	CC		24
NA20863	AA	AA	AA	GG	CC	TT	GG	AA	TT	GG	TT	GG	CC		25
NA21124	AA	AA	AA	GG	CC	TT	GG	AA	TT	GG	TT	GG	CC		26
NA20861	AG	AA	AA	GG	CC	TT	GG	AA	TT	GG	TT	GG	CC		27
NA21087	AG	AA	AA	GG	CC	TT	GG	AA	TT	GG	TT	GG	CC		28
NA20898	AA	AA	AA	GG	CC	TT	GG	AC	TT	GG	TT	GG	CC		29
NA20902	AA	AG	AA	GG	CT	CT	GG	AC	CT	GG	TT	GG	CC		30
NA20876	AG	AG	AG	GG	CC	CT	GG	AC	CT	GG	CT	GG	CC		31
NA20906	AA	AA	AA	GT	CT	CT	GG	AC	CT	GG	CT	GG	CC		32
NA21117	AA	AA	AA	GT	CT	CT	GG	AC	CT	GG	CT	GG	CC		33
NA20859	AA	AG	AG	GT	CT	CT	GG	AC	CT	GG	CT	GG	CC		34
NA21095	AA	AG	AG	GT	CT	CT	GG	AC	CT	GG	CT	GG	CC		35
NA20853	AG	AG	AG	GT	CT	CT	GG	AC	CT	GG	CT	GG	CC		36
NA20866	AG	AG	AG	GT	CT	CT	GG	AC	CT	GG	CT	GG	CC		37
NA21094	AG	AG	AG	GT	CT	CT	GG	AC	CT	GG	CT	GG	CC		38
NA21102	AG	AG	AG	GT	CT	CT	GG	AC	CT	GG	CT	GG	CC		39
NA20894	AG	AG	AG	GT	CT	CT	GG	AC	CT	GG	CT	GG	CC		40
NA21114	AG	AG	AG	GT	CT	CT	GG	AC	CT	GG	CT	GG	CC		41
NA20847	AG	AG	AG	GT	CT	CT	AG	AC	CT	AG	CT	AG	CC		42
NA21137	AG	AG	AG	GT	CT	CT	AG	AC	CT	AG	CT	AG	CC		43
NA20895	AG	AG	AG	GT	CT	CT	AG	AC	CT	AG	CT	AG	CC		44
NA20882	AA	AA	AA	GG	CC	TT	GG	AA	TT	GG	TT	GG	CT		45
NA20884	AA	AA	AA	GG	CC	TT	GG	AA	TT	GG	TT	GG	CT		46
NA21103	AA	AA	AA	GG	CC	TT	GG	AA	TT	GG	TT	GG	CT		47
NA21093	AA	AA	AG	GG	CC	TT	GG	AA	TT	GG	TT	GG	CT		48
NA21111	AG	AG	AG	GG	CC	TT	GG	AA	TT	GG	TT	GG	CT		49
NA21101	AG	AG	AG	GG	CC	CT	GG	AC	CT	GG	CT	GG	CT		50
NA20903	AA	AG	AG	GT	CT	CT	GG	AC	CT	GG	CT	GG	CT		51
NA21132	AA	AG	AG	GT	CT	CT	GG	AC	CT	GG	CT	GG	CT		52
NA21112	AA	AG	AG	GT	CT	CT	AG	AC	CT	AG	CT	AG	CT		53
NA20856	AA	AG	AG	GT	CT	CT	AG	AC	CT	AG	CT	AG	CT		54
NA20907	AG	AG	AG	GT	CT	CT	AG	AC	CT	AG	CT	AG	CT		55
NA20908	AG	AG	AG	GT	CT	CT	AG	AC	CT	AG	CT	AG	CT		56
NA21141	AG	AG	AG	GT	CT	CT	AG	AC	CT	AG	CT	AG	CT		57
NA21142	AG	AG	AG	GT	CT	CT	AG	AC	CT	AG	CT	AG	CT		58
NA20883	AG	AG	AG	GT	CT	CT	AG	AC	CT	AG	CT	AG	CT		59
NA21098	AG	AG	AG	GT	CT	CT	AG	AC	CT	AG	CT	AG	CT		60
NA21100	AG	AG	AG	GT	CT	CT	AG	AC	CT	AG	CT	AG	CT		61
NA21107	AG	AG	AG	GT	CT	CT	AG	AC	CT	AG	CT	AG	CT		62
NA20892	AG	AG	AG	GT	CT	CT	AG	AC	CT	AG	CT	AG	CT		63
NA20900	AG	AG	AG	GT	CT	CT	AG	AC	CT	AG	CT	AG	CT		64
NA21089	AG	AG	AG	GT	CT	CT	AG	AC	CT	AG	CT	AG	CT		65
NA20904	AG	AG	AG	GT	CT	CT	AG	AC	CT	AG	CT	AG	CT		66
NA21116	AG	AG	AG	GT	CT	CT	AG	AC	CT	AG	CT	AG	CT		67
NA21144	AG	AG	AG	GT	CT	CT	AG	AC	CT	AG	CT	AG	CT		68
NA20871	AG	AG	AG	GT	CT	CT	AG	AC	CT	AG	CT	AG	CT		69
NA21118	AG	AG	AG	GT	CT	CT	AG	AC	CT	AG	CT	AG	CT		70
NA20896	AG	AG	AG	GT	CT	CT	AG	AC	CT	AG	CT	AG	CT		71
NA20869	AG	AG	AG	GT	CT	CT	AG	AC	CT	AG	CT	AG	CT		72
NA20885	AG	AG	AG	GT	CT	CT	AG	AC	CT	AG	CT	AG	CT		73
NA20881	AG	AG	AG	GT	CT	CT	AG	AC	CT	AG	CT	AG	CT		74
NA21129	AG	AG	AG	GT	CT	CT	AG	AC	CT	AG	CT	AG	CT		75
NA21134	AG	AG	AG	GT	CT	CT	AG	AC	CT	AG	CT	AG	CT		76
NA21097	AA	AG	AG	GT	CT	CT	AG	AC	CT	AG	CT	AG	TT		1
NA20897	AG	AG	AG	TT	TT	CC	AG	CC	CC	AG	CC	AG	CT		2
NA21126	AG	AG	AG	TT	TT	CC	AG	CC	CC	AG	CC	AG	CT		3
NA21119	AG	GG	GG	TT	TT	NN	AA	CC	CC	AA	CC	AA	CT		4
NA20872	AG	GG	GG	TT	TT	CC	AG	CC	CC	AA	CC	AA	TT		5
NA21091	AG	GG	GG	TT	TT	CT	AG	CC	CC	AG	CC	AG	CT		6
NA20905	AG	GG	GG	TT	TT	CC	GG	CC	CC	AG	CC	AG	CT		7
NA21125	GG	AG	AG	GT	CT	CT	GG	AC	CT	GG	CT	GG	CC		8
NA20891	GG	GG	GG	TT	TT	NN	AA	CC	CC	AA	CC	AA	TT		9
NA20910	GG	GG	GG	TT	TT	CC	AG	CC	CC	AG	CC	AG	CT		10
NA21088	GG	GG	GG	GT	CT	CC	AG	CC	CC	AG	CC	AG	CT		11
NA20845	GG	GG	GG	GT	CT	CT	GG	AC	CT	GG	CT	GG	CC		12
NA20850	GG	GG	GG	TT	TT	CC	AA	CC	CC	AA	CC	AA	TT		13
NA20870	GG	GG	GG	TT	TT	CC	AA	CC	CC	AA	CC	AA	TT		14
NA20889	GG	GG	GG	TT	TT	CC	GG	CC	CC	GG	CC	GG	CC		15
NA20887	GG	GG	GG	TT	TT	CC	AA	CC	CC	AA	CC	AA	TT		16
NA20890	GG	GG	GG	TT	TT	NN	AG	CC	CC	AA	CC	AA	TT		17
NA20909	GG	GG	GG	TT	TT	CC	GG	CC	CC	GG	CC	GG	CC		18
NA21113	GG	GG	GG	GT	CT	CC	AG	CC	CC	AG	CC	AG	CT		19
NA21115	GG	GG	GG	TT	TT	CC	AA	CC	CC	AA	CC	AA	TT		20
NA20854	GG	GG	GG	TT	TT	CC	AA	CC	CC	AA	CC	AA	TT		21
NA20846	GG	GG	GG	TT	TT	CC	AA	CC	CC	AA	CC	AA	TT		22
NA21108	GG	GG	GG	GG	CC	CT	GG	AC	CT	GG	CT	GG	CC		23
NA20873	GG	GG	GG	TT	TT	CC	AA	CC	CC	AA	CC	AA	TT		24
NA21131	GG	GG	GG	GT	CT	CT	GG	AC	CT	GG	CT	GG	CT		25

## Sheet: S7_JPT
Table S7 Genotypes for available SNPs corresponding to the 23-SNP pattern for the JPT individuals in the HapMap data.
rs#	rs10409851	rs4806874	rs10415622	rs12608998	rs8105402	rs7008	rs2238614	rs1860938	rs2110118	rs4807330	rs1640262	rs1736192	rs1736181	rs1640271
alleles	A/G	A/G	A/G	G/T	C/T	C/T	A/G	A/C	C/T	A/G	C/T	A/G	C/T	C/T
chrom	chr19	chr19	chr19	chr19	chr19	chr19	chr19	chr19	chr19	chr19	chr19	chr19	chr19	chr19		JPT
pos	2677199	2689352	2690696	2704270	2704983	2705978	2706339	2711878	2726144	2728662	2730134	2735678	2748703	2750979		Carrier Frequency =		0.566372
NA18945	AA	AA	AA	GG	CC	TT	GG	AA	TT	GG	TT	GG	CC	CC		1
NA18972	AA	AA	AA	GG	CC	TT	GG	AA	TT	GG	TT	GG	CC	CC		2
NA18987	AA	AA	AA	GG	CC	TT	GG	AA	TT	GG	TT	GG	CC	CC		3
NA18991	AA	AA	AA	GG	CC	TT	GG	AA	TT	GG	TT	GG	CC	CC		4
NA19005	AA	AA	AA	GG	CC	TT	GG	AA	TT	GG	TT	GG	CC	CC		5
NA18942	AG	AG	AG	GT	CT	CT	GG	AC	CT	GG	CT	GG	CT	CC		6
NA18959	AG	AG	AG	GT	CT	CT	GG	AC	CT	GG	CT	GG	CT	CC		7
NA18965	AG	AG	AG	GT	CT	CT	GG	AC	CT	GG	CT	GG	CT	CC		8
NA18978	AG	AG	AG	GT	CT	CT	GG	AC	CT	GG	CT	GG	CT	CC		9
NA18981	AG	AG	AG	GT	CT	CT	GG	AC	CT	GG	CT	GG	CT	CC		10
NA18998	AG	AG	AG	GT	CT	CT	GG	AC	CT	GG	CT	GG	CT	CC		11
NA18963	AA	AA	AA	GG	CC	TT	GG	AA	TT	GG	TT	GG	NN	CC		12
NA19010	AA	AA	AA	GG	CC	TT	GG	AA	TT	GG	TT	GG	NN	CC		13
NA19011	AA	AA	AA	GG	CC	TT	GG	AA	TT	GG	TT	GG	NN	CC		14
NA19060	AA	AA	AA	GG	CC	TT	GG	AA	TT	GG	TT	GG	NN	CC		15
NA19089	AA	AA	AA	GG	CC	TT	GG	AA	TT	GG	TT	GG	NN	CC		16
NA19550	AA	AA	AA	GG	CC	TT	GG	AA	TT	GG	TT	GG	NN	CC		17
NA19570	AA	AA	AA	GG	CC	TT	GG	AA	TT	GG	TT	GG	NN	CC		18
NA19054	AG	AA	AA	GG	CC	TT	GG	AA	TT	GG	TT	GG	NN	CC		19
NA19546	AA	AA	AA	GG	CC	TT	GG	AC	CT	GG	CT	GG	NN	CC		20
NA18939	AA	AG	AG	GT	CT	CT	GG	AC	CT	GG	CT	GG	NN	CC		21
NA18977	AG	AG	AG	GT	CT	CT	GG	AC	CT	GG	CT	GG	NN	CC		22
NA19000	AG	AG	AG	GT	CT	CT	GG	AC	CT	GG	CT	GG	NN	CC		23
NA19002	AG	AG	AG	GT	CT	CT	GG	AC	CT	GG	CT	GG	NN	CC		24
NA19006	AG	AG	AG	GT	CT	CT	GG	AC	CT	GG	CT	GG	NN	CC		25
NA19057	AG	AG	AG	GT	CT	CT	GG	AC	CT	GG	CT	GG	NN	CC		26
NA19066	AG	AG	AG	GT	CT	CT	GG	AC	CT	GG	CT	GG	NN	CC		27
NA19068	AG	AG	AG	GT	CT	CT	GG	AC	CT	GG	CT	GG	NN	CC		28
NA19557	AG	AG	AG	GT	CT	CT	GG	AC	CT	GG	CT	GG	NN	CC		29
NA18980	AG	AG	AG	GT	CT	CT	GG	AC	CT	GG	CT	GG	CT	CT		30
NA18997	AG	AA	AA	GT	CT	CT	AG	AC	CT	AG	CT	AG	CT	CT		31
NA18940	AA	AG	AG	GT	CT	CT	AG	AC	CT	AG	CT	AG	CT	CT		32
NA18961	AA	AG	AG	GT	CT	CT	AG	AC	CT	AG	CT	AG	CT	CT		33
NA18944	AG	AG	AG	GT	CT	CT	AG	AC	CT	AG	CT	AG	CT	CT		34
NA18956	AG	AG	AG	GT	CT	CT	AG	AC	CT	AG	CT	AG	CT	CT		35
NA18975	AG	AG	AG	GT	CT	CT	AG	AC	CT	AG	CT	AG	CT	CT		36
NA19007	AG	AG	AG	GT	CT	CT	AG	AC	CT	AG	CT	AG	CT	CT		37
NA19084	AA	AA	AA	GT	CT	CT	NN	AC	CT	AG	CT	AG	NN	CT		38
NA19078	AA	AA	AA	GT	CT	CT	AG	AC	CT	AG	CT	AG	NN	CT		39
NA19062	AG	AA	AA	GT	CT	CT	AG	AC	CT	AG	CT	AG	NN	CT		40
NA19081	AG	AA	AA	GT	CT	CT	AG	AC	CT	AG	CT	AG	NN	CT		41
NA19545	AG	AA	AA	GT	CT	CT	AG	AC	CT	AG	CT	AG	NN	CT		42
NA18955	AA	AG	AG	GT	CT	CT	AG	AC	CT	AG	CT	AG	NN	CT		43
NA18979	AA	AG	AG	GT	CT	CT	AG	AC	CT	AG	CT	AG	NN	CT		44
NA19009	AA	AG	AG	GT	CT	CT	AG	AC	CT	AG	CT	AG	NN	CT		45
NA18950	AG	AG	AG	GT	CT	CT	AG	AC	CT	AG	CT	AG	NN	CT		46
NA18988	AG	AG	AG	GT	CT	CT	AG	AC	CT	AG	CT	AG	NN	CT		47
NA18989	AG	AG	AG	GT	CT	CT	AG	AC	CT	AG	CT	AG	NN	CT		48
NA19001	AG	AG	AG	GT	CT	CT	AG	AC	CT	AG	CT	AG	NN	CT		49
NA19065	AG	AG	AG	GT	CT	CT	AG	AC	CT	AG	CT	AG	NN	CT		50
NA19070	AG	AG	AG	GT	CT	CT	AG	AC	CT	AG	CT	AG	NN	CT		51
NA19072	AG	AG	AG	GT	CT	CT	AG	AC	CT	AG	CT	AG	NN	CT		52
NA19075	AG	AG	AG	GT	CT	CT	AG	AC	CT	AG	CT	AG	NN	CT		53
NA19079	AG	AG	AG	GT	CT	CT	AG	AC	CT	AG	CT	AG	NN	CT		54
NA19080	AG	AG	AG	GT	CT	CT	AG	AC	CT	AG	CT	AG	NN	CT		55
NA19083	AG	AG	AG	GT	CT	CT	AG	AC	CT	AG	CT	AG	NN	CT		56
NA19085	AG	AG	AG	GT	CT	CT	AG	AC	CT	AG	CT	AG	NN	CT		57
NA19087	AG	AG	AG	GT	CT	CT	AG	AC	CT	AG	CT	AG	NN	CT		58
NA19548	AG	AG	AG	GT	CT	CT	AG	AC	CT	AG	CT	AG	NN	CT		59
NA19556	AG	AG	AG	GT	CT	CT	AG	AC	CT	AG	CT	AG	NN	CT		60
NA19563	AG	AG	AG	GT	CT	CT	AG	AC	CT	AG	CT	AG	NN	CT		61
NA19569	AG	AG	AG	GT	CT	CT	AG	AC	CT	AG	CT	AG	NN	CT		62
NA19573	AG	AG	AG	GT	CT	CT	AG	AC	CT	AG	CT	AG	NN	CT		63
NA19063	NN	AG	AG	GT	CT	CT	GG	AC	CT	GG	CT	GG	NN	CC		64
NA18949	AG	AG	AG	GT	CT	CT	GG	AC	CT	GG	CT	GG	TT	CC		1
NA18967	AA	AA	AA	GT	CT	CT	AG	AC	CT	AG	CT	AG	TT	CT		2
NA19564	AG	AG	AG	GT	CT	CT	AG	AC	CC	AA	CC	AG	NN	CT		3
NA19566	AG	AG	AG	GT	CT	CT	AG	CC	CT	AG	CT	AG	NN	CT		4
NA18994	AA	AA	AA	TT	TT	CC	AG	CC	CC	AG	CC	AG	TT	CT		5
NA18993	AA	AG	AG	TT	TT	CC	AA	CC	CC	AA	CC	AA	NN	TT		6
NA18970	AG	AG	AG	TT	TT	CC	AG	CC	CC	AG	CC	AG	TT	CT		7
NA18971	AG	AG	AG	TT	TT	CC	AA	CC	CC	AA	CC	AA	TT	TT		8
NA19058	AG	AG	AG	TT	TT	CC	AA	CC	CC	AA	CC	AA	NN	TT		9
NA19088	AA	GG	GG	TT	TT	CC	AA	CC	CC	AA	CC	AA	NN	TT		10
NA18946	AG	GG	GG	TT	TT	CC	AG	CC	CC	AG	CC	AG	NN	CT		11
NA18960	AG	GG	GG	TT	TT	CC	AA	CC	CC	AA	CC	AA	TT	TT		12
NA18985	AG	GG	GG	TT	TT	CC	AA	CC	CC	AA	CC	AA	NN	TT		13
NA19067	AG	GG	GG	GT	CT	CT	AG	AC	CT	AG	CT	AG	NN	CT		14
NA19086	AG	GG	GG	TT	TT	CC	AG	CC	CC	AG	CC	AG	NN	CT		15
NA18943	GG	GG	GG	TT	TT	CC	AA	CC	CC	AA	CC	AA	TT	CT		16
NA18947	GG	GG	GG	TT	TT	CC	AA	CC	CC	AA	CC	AA	TT	TT		17
NA18948	GG	GG	GG	TT	TT	CC	AG	CC	CC	AG	CC	AG	TT	CT		18
NA18951	GG	GG	GG	TT	TT	CC	AA	CC	CC	AA	CC	AA	TT	TT		19
NA18952	GG	GG	GG	TT	TT	CC	AG	CC	CC	AG	CC	AG	TT	CT		20
NA18953	GG	GG	GG	TT	TT	CC	AG	CC	CC	AG	CC	AG	TT	CT		21
NA18954	GG	GG	GG	TT	TT	CC	AG	CC	CC	AG	CC	AG	NN	CT		22
NA18957	GG	GG	GG	TT	TT	CC	AG	CC	CC	AG	CC	AG	NN	CT		23
NA18962	GG	GG	GG	TT	TT	CC	AG	CC	CC	AG	CC	AG	NN	CT		24
NA18964	GG	GG	GG	TT	TT	CC	AG	CC	CC	AG	CC	AG	TT	CT		25
NA18966	GG	GG	GG	TT	TT	CC	AG	CC	CC	AG	CC	AG	TT	CT		26
NA18968	GG	GG	GG	TT	TT	CC	AA	CC	CC	AA	CC	AA	TT	TT		27
NA18969	GG	GG	GG	TT	TT	CC	AA	CC	CC	AA	CC	AA	TT	TT		28
NA18973	GG	AG	AG	GT	CT	CT	GG	AC	CT	GG	CT	GG	CT	CC		29
NA18974	GG	GG	GG	TT	TT	NN	AA	CC	CC	AA	CC	AA	TT	TT		30
NA18976	GG	AG	AG	GT	CT	CT	AG	AC	CT	AG	CT	AG	CT	CT		31
NA18982	GG	GG	GG	TT	TT	CC	AA	CC	CC	AA	CC	AA	NN	TT		32
NA18983	GG	GG	GG	TT	TT	CC	AA	CC	CC	AA	CC	AA	NN	CT		33
NA18990	GG	GG	GG	TT	TT	CC	AG	CC	CC	AG	CC	AG	TT	CT		34
NA18995	GG	GG	GG	TT	TT	CC	AG	CC	CC	AG	CC	AG	TT	CT		35
NA18999	GG	AG	AG	TT	TT	CC	AA	CC	CC	AA	CC	AA	TT	TT		36
NA19004	GG	GG	GG	TT	TT	CC	AG	CC	CC	AG	CC	AG	NN	CT		37
NA19055	GG	AG	AG	GT	CT	CT	GG	AC	CT	GG	CT	GG	NN	CC		38
NA19056	GG	GG	GG	TT	TT	CT	AG	CC	CC	AG	CC	AG	NN	CT		39
NA19059	GG	GG	GG	TT	TT	CC	AA	CC	CC	AA	CC	AA	NN	TT		40
NA19064	GG	GG	GG	TT	TT	CC	AG	CC	CC	AG	CC	AG	NN	CT		41
NA19074	GG	GG	GG	TT	TT	CC	AA	CC	CC	AA	CC	AA	NN	TT		42
NA19076	GG	GG	GG	TT	TT	CC	AG	CC	CC	AG	CC	AG	NN	CT		43
NA19077	GG	GG	GG	TT	TT	CC	AA	CC	CC	AA	CC	AA	NN	TT		44
NA19090	GG	GG	GG	TT	TT	CC	AG	CC	CC	AG	CC	AG	NN	CT		45
NA19091	GG	AG	AG	TT	TT	CC	AA	CC	CC	AA	CC	AA	NN	TT		46
NA19558	GG	GG	GG	TT	TT	CC	AA	CC	CC	AA	CC	AA	NN	TT		47
NA19559	GG	GG	GG	TT	TT	CC	GG	CC	CC	GG	CC	GG	NN	CC		48
NA19562	GG	AG	AG	GT	CT	CT	AG	NN	CT	AG	CT	AG	NN	CT		49
NA18992	NN	NN	NN	NN	NN	NN	NN	NN	NN	NN	NN	NN	CT	NN
NA19003	NN	NN	NN	NN	NN	NN	NN	NN	NN	NN	NN	NN	CC	NN
NA19012	NN	NN	NN	NN	NN	NN	NN	NN	NN	NN	NN	NN	TT	NN

## Sheet: S8_LWK
Table S8 Genotypes for available SNPs corresponding to the 23-SNP pattern for the LWK individuals in the HapMap data.
rs#	rs10409851	rs4806874	rs10415622	rs12608998	rs8105402	rs7008	rs2238614	rs1860938	rs2110118	rs4807330	rs1640262	rs1736192	rs1640271
alleles	A/G	A/G	A/G	G/T	C/T	C/T	A/G	A/C	C/T	A/G	C/T	A/G	C/T
chrom	chr19	chr19	chr19	chr19	chr19	chr19	chr19	chr19	chr19	chr19	chr19	chr19	chr19		LWK
pos	2677199	2689352	2690696	2704270	2704983	2705978	2706339	2711878	2726144	2728662	2730134	2735678	2750979		Carrier Frequency =		0.136364
NA19309	AG	AG	AG	GG	CC	TT	GG	AA	TT	GG	TT	GG	CC		1
NA19019	AG	AG	AG	GG	CT	TT	GG	AC	TT	GG	CT	GG	CC		2
NA19319	AG	AG	AG	GG	CC	CT	GG	AC	CT	GG	CT	GG	CC		3
NA19379	AG	AG	AG	GT	CT	CT	GG	AC	CT	GG	CT	GG	CC		4
NA19468	AG	AG	AG	GT	CT	CT	GG	AC	CT	GG	CT	GG	CC		5
NA19039	AG	AG	AG	GT	CT	CT	GG	AC	CT	GG	CT	GG	CC		6
NA19327	AG	AG	AG	GT	CT	CT	AG	AC	CT	GG	CT	GG	CC		7
NA19402	AA	AG	AG	GG	CC	TT	GG	AA	TT	GG	TT	GG	CT		8
NA19473	AG	AG	AG	GG	CT	CT	GG	AC	TT	GG	CT	GG	CT		9
NA19454	AG	AG	AG	GG	CT	CT	GG	AC	TT	GG	CT	GG	CT		10
NA19429	AG	AG	AG	GG	CT	TT	GG	AC	CT	GG	CT	GG	CT		11
NA19328	AG	AG	AG	GG	CC	CT	GG	AC	CT	GG	CT	GG	CT		12
NA19391	AG	AG	AG	GG	CC	CT	GG	AC	CT	GG	CT	GG	CT		13
NA19311	AG	AG	AG	GT	CT	CT	GG	AC	CT	GG	CT	GG	CT		14
NA19457	AG	AG	AG	GT	CT	CT	GG	AC	CT	GG	CT	GG	CT		15
NA19399	AG	AG	AG	GG	CT	CT	GG	AC	CT	GG	CT	GG	TT		1
NA19307	AG	AG	AG	GG	CT	CT	GG	AC	CT	AG	CC	AG	TT		2
NA19371	AG	AG	AG	GG	CT	TT	GG	AC	CC	AG	CC	AG	CT		3
NA19377	AG	AG	AG	GT	CT	CT	GG	AC	CC	AG	CC	AG	CT		4
NA19434	AG	AG	AG	GT	CT	CT	GG	AC	CC	AG	CC	AG	CT		5
NA19432	AG	AG	AG	GT	CT	CT	GG	AC	CC	AG	CC	AG	CT		6
NA19392	AG	AG	AG	GT	TT	CC	GG	CC	CT	GG	CC	GG	CC		7
NA19350	AA	GG	GG	GT	CT	CT	GG	CC	CC	GG	CC	NN	CC		8
NA19332	AA	GG	GG	TT	TT	CC	GG	CC	CC	GG	CC	AG	TT		9
NA19031	AG	GG	GG	TT	TT	CC	GG	CC	CC	GG	CC	GG	CT		10
NA19317	AG	GG	GG	TT	TT	CC	GG	CC	CC	GG	CC	GG	CT		11
NA19376	AG	GG	GG	GT	CT	CT	GG	AC	CT	GG	CT	GG	CC		12
NA19440	AG	GG	GG	GT	TT	CC	GG	CC	CT	GG	CC	GG	CT		13
NA19467	AG	GG	GG	GT	CT	CC	GG	CC	CC	GG	CC	GG	CC		14
NA19471	AG	GG	GG	TT	TT	CC	GG	CC	CC	GG	CC	GG	CT		15
NA19375	AG	GG	GG	GT	CT	CT	GG	AC	CT	GG	CT	GG	CC		16
NA19384	AG	GG	GG	GT	CT	CT	GG	AC	CT	GG	CT	GG	TT		17
NA19452	AG	GG	GG	TT	TT	CC	AG	AC	CC	AG	CC	AG	CT		18
NA19451	AG	GG	GG	TT	TT	CC	AG	AC	CC	AG	CC	AG	CT		19
NA19024	AG	GG	GG	GT	TT	CC	GG	CC	CT	GG	CC	GG	TT		20
NA19323	AG	GG	GG	GT	TT	CC	AG	AC	CT	AG	CC	AG	CT		21
NA19028	GG	GG	GG	GT	CT	CC	GG	CC	CT	GG	CT	GG	CC		22
NA19035	GG	GG	GG	GG	CT	CC	GG	CC	CT	GG	CC	GG	CT		23
NA19027	GG	GG	GG	GT	TT	CT	GG	CC	CC	GG	CC	GG	CT		24
NA19041	GG	AG	AG	GT	CT	CT	GG	AC	CT	GG	CT	GG	CT		25
NA19046	GG	GG	GG	GT	TT	CC	GG	CC	CT	GG	CC	GG	TT		26
NA19308	GG	AG	AG	GT	CT	CT	GG	AC	CT	GG	CT	GG	CC		27
NA19380	GG	GG	GG	GT	CT	CT	GG	CC	CC	GG	CC	AG	CT		28
NA19383	GG	GG	GG	GT	TT	CC	GG	CC	CT	GG	CC	GG	TT		29
NA19393	GG	GG	GG	TT	TT	CC	AG	AC	CC	AG	CC	AG	CT		30
NA19397	GG	GG	GG	GT	CT	CT	AG	AA	CT	AG	CT	AG	CT		31
NA19430	GG	GG	GG	GT	TT	CC	GG	CC	CC	GG	CC	AG	CT		32
NA19466	GG	GG	GG	TT	TT	CC	GG	CC	CC	GG	CC	GG	CT		33
NA19038	GG	GG	GG	GT	CT	CT	GG	AC	CT	GG	CT	GG	CC		34
NA19314	GG	GG	GG	TT	TT	CC	GG	CC	CC	GG	CC	GG	CT		35
NA19315	GG	GG	GG	GG	CT	CT	GG	AC	TT	GG	CT	GG	CT		36
NA19324	GG	GG	GG	GG	CC	TT	GG	AA	TT	GG	TT	GG	CC		37
NA19381	GG	GG	GG	GT	TT	CT	GG	CC	CC	GG	CC	GG	CC		38
NA19398	GG	GG	GG	GG	CT	CC	GG	CC	CT	GG	CC	GG	CT		39
NA19403	GG	GG	GG	GT	TT	CC	GG	CC	CT	GG	CC	GG	CT		40
NA19437	GG	GG	GG	TT	TT	CC	GG	CC	CC	GG	CC	GG	CC		41
NA19439	GG	GG	GG	GT	CT	CT	GG	AC	CT	GG	CT	GG	CC		42
NA19463	GG	GG	GG	GT	TT	CC	GG	CC	CT	GG	CC	GG	TT		43
NA19470	GG	GG	GG	GT	TT	CT	GG	CC	CC	GG	CC	GG	CT		44
NA19318	GG	GG	GG	GT	CT	CT	GG	AC	CT	GG	CT	GG	CC		45
NA19334	GG	GG	GG	GG	CT	CT	GG	AC	CT	GG	CT	GG	CT		46
NA19352	GG	GG	GG	GG	CC	CT	GG	AC	CT	GG	CT	GG	CT		47
NA19359	GG	GG	GG	TT	TT	CC	AG	CC	CC	AG	CC	AG	CT		48
NA19428	GG	GG	GG	GT	CT	CC	GG	CC	CC	GG	CC	GG	CC		49
NA19443	GG	AG	AG	GT	CT	CT	GG	AC	CT	GG	CT	GG	CC		50
NA19455	GG	GG	GG	GT	CT	CT	GG	AC	CT	GG	CT	GG	CC		51
NA19313	GG	GG	GG	GT	TT	CC	GG	CC	CT	GG	CC	GG	CT		52
NA19316	GG	GG	GG	TT	TT	CC	GG	CC	CC	GG	CC	GG	CC		53
NA19321	GG	GG	GG	TT	TT	CC	AA	AA	CC	AA	CC	AA	TT		54
NA19396	GG	GG	GG	GT	CT	CT	AG	AA	CT	AG	CT	AG	CT		55
NA19435	GG	GG	GG	TT	TT	CC	GG	CC	CC	GG	CC	GG	CC		56
NA19436	GG	GG	GG	GG	TT	CC	GG	CC	CT	GG	CC	GG	CT		57
NA19438	GG	GG	GG	GT	CT	CT	AG	AC	CT	AG	CT	AG	CC		58
NA19445	GG	GG	GG	TT	TT	CC	AG	CC	CC	AG	CC	AG	CT		59
NA19446	GG	AG	AG	GT	CT	CT	AG	AC	CT	AG	CT	AG	CT		60
NA19462	GG	GG	GG	TT	TT	CC	GG	CC	CC	GG	CC	GG	CC		61
NA19469	GG	GG	GG	TT	TT	CC	GG	CC	CC	GG	CC	GG	CT		62
NA19472	GG	GG	GG	TT	TT	CC	AG	AC	CC	AG	CC	AG	CT		63
NA19346	GG	GG	GG	GT	CT	CC	AG	CC	CC	AG	CC	AG	CT		64
NA19347	GG	GG	GG	GT	CT	CC	GG	CC	CC	GG	CC	GG	CT		65
NA19374	GG	GG	GG	GT	CT	CT	GG	AC	CT	GG	CT	GG	CC		66
NA19382	GG	GG	GG	GT	TT	CT	AG	CC	CC	AG	CC	AG	CT		67
NA19385	GG	GG	GG	TT	TT	CC	AG	CC	CC	AG	CC	AG	CT		68
NA19444	GG	GG	GG	TT	TT	CC	GG	CC	CC	GG	CC	GG	CC		69
NA19448	GG	GG	GG	GT	CT	CT	GG	AC	CT	GG	CT	GG	TT		70
NA19390	GG	AG	AG	GG	CC	CT	GG	AC	CT	GG	CT	GG	CC		71
NA19404	GG	GG	GG	TT	TT	CC	AG	CC	CC	AG	CC	AG	CT		72
NA19431	GG	GG	GG	GT	CT	CC	GG	CC	CT	GG	CT	GG	CC		73
NA19449	GG	GG	GG	GG	CT	CT	GG	CC	TT	GG	CT	GG	CC		74
NA19456	GG	GG	GG	GT	TT	CT	GG	CC	CC	GG	CC	GG	CT		75
NA19474	GG	GG	GG	GG	CT	CC	GG	CC	CT	GG	CC	GG	CT		76
NA19373	GG	GG	GG	TT	TT	CC	GG	CC	CC	GG	CC	GG	CT		77
NA19036	GG	GG	GG	GG	CT	CT	GG	AC	TT	GG	CT	GG	CT		78
NA19394	GG	GG	GG	GT	TT	CC	GG	CC	CC	GG	CC	AG	CT		79
NA19044	GG	GG	GG	GG	CT	CT	GG	AC	CT	GG	CT	GG	CC		80
NA19360	GG	GG	GG	GT	TT	CC	GG	CC	CC	GG	CC	GG	CC		81
NA19310	GG	GG	GG	TT	TT	CC	GG	CC	CC	GG	CC	GG	CT		82
NA19372	GG	GG	GG	GT	TT	CC	GG	CC	CT	GG	CC	GG	CT		83
NA19022	GG	GG	GG	GT	CT	CT	GG	AC	CT	GG	CT	GG	CT		84
NA19017	GG	AG	AG	GT	CT	CT	GG	AC	CT	GG	CT	GG	CC		85
NA19441	GG	GG	GG	TT	TT	CC	GG	CC	CC	GG	CC	GG	CT		86
NA19475	GG	GG	GG	GT	CT	CC	GG	CC	CC	GG	CC	GG	CC		87
NA19026	GG	GG	GG	GT	CT	CT	AG	AA	CT	AG	CT	AG	CT		88
NA19023	GG	GG	GG	TT	TT	CC	GG	CC	CC	GG	CC	GG	CC		89
NA19378	GG	GG	GG	TT	TT	CC	GG	CC	CC	GG	CC	GG	CT		90
NA19025	GG	GG	GG	GT	CT	CT	GG	AC	CT	GG	CT	GG	CC		91
NA19030	GG	GG	GG	GT	CT	CT	GG	AC	CT	GG	CT	GG	CC		92
NA19037	GG	GG	GG	GG	CC	CT	GG	AC	CT	GG	CT	GG	CC		93
NA19043	GG	GG	NN	GT	TT	NN	AG	CC	CC	AG	CC	AG	CT		94
NA19045	GG	GG	GG	GT	TT	CC	GG	CC	CT	GG	CC	GG	TT		95

## Sheet: S9_MEX
Table S9 Genotypes for available SNPs corresponding to the 23-SNP pattern for the MEX individuals in the HapMap data.
rs#	rs10409851	rs4806874	rs10415622	rs12608998	rs8105402	rs7008	rs2238614	rs1860938	rs2110118	rs4807330	rs1640262	rs1736192	rs1640271
alleles	A/G	A/G	A/G	G/T	C/T	C/T	A/G	A/C	C/T	A/G	C/T	A/G	C/T
chrom	chr19	chr19	chr19	chr19	chr19	chr19	chr19	chr19	chr19	chr19	chr19	chr19	chr19		MEX
pos	2677199	2689352	2690696	2704270	2704983	2705978	2706339	2711878	2726144	2728662	2730134	2735678	2750979		Carrier Frequency =		0.825581
NA19722	AA	AA	AA	GG	CC	TT	GG	AA	TT	GG	TT	GG	CC		1
NA19649	AA	AA	AA	GG	CC	TT	GG	AA	TT	GG	TT	GG	CC		2
NA19686	AA	AA	AA	GG	CC	TT	GG	AA	TT	GG	TT	GG	CC		3
NA19653	AA	AA	AA	GG	CC	TT	GG	AA	TT	GG	TT	GG	CC		4
NA19684	AA	AA	AA	GG	CC	TT	GG	AA	TT	GG	TT	GG	CC		5
NA19661	AA	AA	AA	GG	CC	TT	GG	AA	TT	GG	TT	GG	CC		6
NA19779	AA	AA	AA	GG	CC	TT	GG	AA	TT	GG	TT	GG	CC		7
NA19659	AA	AA	AA	GG	CC	TT	GG	AA	TT	GG	TT	GG	CC		8
NA19660	AA	AA	AA	GG	CC	TT	GG	AA	TT	GG	TT	GG	CC		9
NA19662	AA	AA	AA	GG	CC	TT	GG	AA	TT	GG	TT	GG	CC		10
NA19678	AA	AA	AA	GG	CC	TT	GG	AA	TT	GG	TT	GG	CC		11
NA19681	AA	AA	AA	GG	CC	TT	GG	AA	TT	GG	TT	GG	CC		12
NA19795	AA	AA	AA	GG	CC	TT	GG	AA	TT	GG	TT	GG	CC		13
NA19761	AA	AA	AA	GG	CC	TT	GG	AA	TT	GG	TT	GG	CC		14
NA19750	AA	AA	AA	GG	CC	TT	GG	AA	TT	GG	TT	GG	CC		15
NA19685	AA	AA	AA	GG	CC	TT	GG	AA	TT	GG	TT	GG	CC		16
NA19652	AA	AA	AA	GG	CC	TT	GG	AA	TT	GG	TT	GG	CC		17
NA19672	AA	AA	AA	GG	CC	TT	GG	AA	TT	GG	TT	GG	CC		18
NA19740	AA	AA	AA	GG	CC	TT	GG	AA	TT	GG	TT	GG	CC		19
NA19741	AA	AA	AA	GG	CC	TT	GG	AA	TT	GG	TT	GG	CC		20
NA19792	AA	AA	AA	GG	CC	TT	GG	AA	TT	GG	TT	GG	CC		21
NA19775	AG	AA	AA	GG	CC	TT	GG	AA	TT	GG	TT	GG	CC		22
NA19737	AG	AA	AA	GG	CC	TT	GG	AA	TT	GG	TT	GG	CC		23
NA19675	AG	AG	AG	GG	CC	TT	GG	AA	TT	GG	TT	GG	CC		24
NA19683	AG	AG	AG	GG	CC	TT	GG	AA	TT	GG	TT	GG	CC		25
NA19776	AG	AG	AG	GG	CC	TT	GG	AA	TT	GG	TT	GG	CC		26
NA19650	AG	AG	AG	GG	CC	TT	GG	AA	TT	GG	TT	GG	CC		27
NA19680	AG	AG	AG	GG	CC	TT	GG	AA	TT	GG	TT	GG	CC		28
NA19718	AG	AG	AG	GG	CC	TT	GG	AA	TT	GG	TT	GG	CC		29
NA19679	AG	AG	AG	GG	CC	TT	GG	AA	TT	GG	TT	GG	CC		30
NA19663	AA	AA	AA	GG	CC	CT	GG	AA	TT	GG	TT	GG	CC		31
NA19665	AA	AA	AA	GG	CC	CT	GG	AA	TT	GG	TT	GG	CC		32
NA19725	AA	AA	AA	GG	CC	CT	GG	AA	TT	GG	TT	GG	CC		33
NA19756	AA	AA	AA	GG	CC	CT	GG	AA	TT	GG	TT	GG	CC		34
NA19788	AA	AA	AA	GG	CC	CT	GG	AA	TT	GG	TT	GG	CC		35
NA19746	AA	AA	AA	GG	CC	CT	GG	AA	TT	GG	TT	GG	CC		36
NA19658	AA	AA	AA	GG	CC	TT	AG	AA	TT	GG	TT	GG	CC		37
NA19762	AG	AG	AA	GT	CT	CT	AG	AA	TT	GG	TT	GG	CC		38
NA19763	AG	AG	AA	GT	CT	CT	AG	AA	TT	GG	TT	GG	CC		39
NA19764	AA	AA	AA	GG	CC	TT	GG	NN	TT	GG	TT	GG	CC		40
NA19656	AG	AG	AG	GG	CC	CT	GG	AC	CT	GG	CT	GG	CC		41
NA19670	AG	AG	AG	GT	CT	CT	GG	AC	CT	GG	CT	GG	CC		42
NA19664	AG	AG	AG	GT	CT	CT	AG	AC	CT	AG	CT	AG	CC		43
NA19759	AG	AG	AG	GT	CT	NN	AG	AC	CT	AG	CT	AG	CT		44
NA19719	AA	AA	AA	GT	CT	CT	AG	AC	CT	AG	CT	AG	CT		45
NA19716	AA	AA	AA	GT	CT	CT	AG	AC	CT	AG	CT	AG	CT		46
NA19651	AA	AG	AG	GT	CT	CT	AG	AC	CT	AG	CT	AG	CT		47
NA19796	AA	AG	AG	GT	CT	CT	AG	AC	CT	AG	CT	AG	CT		48
NA19787	AA	AG	AG	GT	CT	CT	AG	AC	CT	AG	CT	AG	CT		49
NA19794	AA	AG	AG	GT	CT	CT	AG	AC	CT	AG	CT	AG	CT		50
NA19657	AG	AG	AG	GT	CT	CT	AG	AC	CT	AG	CT	AG	CT		51
NA19724	AG	AG	AG	GT	CT	CT	AG	AC	CT	AG	CT	AG	CT		52
NA19726	AG	AG	AG	GT	CT	CT	AG	AC	CT	AG	CT	AG	CT		53
NA19780	AG	AG	AG	GT	CT	CT	AG	AC	CT	AG	CT	AG	CT		54
NA19676	AG	AG	AG	GT	CT	CT	AG	AC	CT	AG	CT	AG	CT		55
NA19677	AG	AG	AG	GT	CT	CT	AG	AC	CT	AG	CT	AG	CT		56
NA19772	AG	AG	AG	GT	CT	CT	AG	AC	CT	AG	CT	AG	CT		57
NA19774	AG	AG	AG	GT	CT	CT	AG	AC	CT	AG	CT	AG	CT		58
NA19778	AG	AG	AG	GT	CT	CT	AG	AC	CT	AG	CT	AG	CT		59
NA19783	AG	AG	AG	GT	CT	CT	AG	AC	CT	AG	CT	AG	CT		60
NA19784	AG	AG	AG	GT	CT	CT	AG	AC	CT	AG	CT	AG	CT		61
NA19682	AG	AG	AG	GT	CT	CT	AG	AC	CT	AG	CT	AG	CT		62
NA19785	AG	AG	AG	GT	CT	CT	AG	AC	CT	AG	CT	AG	CT		63
NA19781	AG	AG	AG	GT	CT	CT	AG	AC	CT	AG	CT	AG	CT		64
NA19782	AG	AG	AG	GT	CT	CT	AG	AC	CT	AG	CT	AG	CT		65
NA19748	AG	AG	AG	GT	CT	CT	AG	AC	CT	AG	CT	AG	CT		66
NA19790	AG	AG	AG	GT	CT	CT	AG	AC	CT	AG	CT	AG	CT		67
NA19654	AG	AG	AG	GT	CT	CT	AG	AC	CT	AG	CT	AG	CT		68
NA19751	AG	AG	AG	GT	CT	CT	AG	AC	CT	AG	CT	AG	CT		69
NA19770	AG	AG	AG	GT	CT	CT	AG	AC	CT	AG	CT	AG	CT		70
NA19789	AG	AG	NN	GT	CT	CT	AG	AC	CT	AG	CT	AG	CT		71
NA19757	AG	AG	AG	GG	CC	CC	GG	AC	TT	GG	TT	GG	CC		1
NA19720	AA	AA	AA	GT	CT	CC	AG	AC	CT	AG	CT	AG	CT		2
NA19727	AG	AG	AG	GT	CT	CC	AG	AC	CT	AG	CT	AG	CT		3
NA19721	AA	AA	AA	TT	TT	CC	AA	CC	CC	AA	CC	AA	TT		4
NA19777	AG	AG	AG	TT	TT	CC	AA	CC	CC	AA	CC	AA	TT		5
NA19773	AG	AG	GG	GT	CT	CT	AG	AC	CT	AG	CT	AG	CT		6
NA19723	GG	GG	GG	TT	TT	CC	AA	CC	CC	AA	CC	AA	TT		7
NA19669	GG	GG	GG	TT	TT	CC	AA	CC	CC	AA	CC	AA	TT		8
NA19747	GG	GG	GG	TT	TT	CC	AA	CC	CC	AA	CC	AA	TT		9
NA19755	GG	GG	GG	GT	CT	CC	AG	CC	CT	AG	CT	AG	CT		10
NA19671	GG	GG	GG	TT	TT	CC	AG	CC	CC	AG	CC	AG	CT		11
NA19771	GG	GG	GG	TT	TT	CC	AA	CC	CC	AA	CC	AA	TT		12
NA19760	GG	GG	GG	TT	TT	CC	AA	CC	CC	AA	CC	AA	TT		13
NA19749	GG	AG	AG	GT	CT	CT	AG	AC	CT	AG	CT	AG	CT		14
NA19786	GG	GG	GG	TT	TT	CC	AA	CC	CC	AA	CC	AA	TT		15

## Sheet: S10_MKK
Table S10 Genotypes for available SNPs corresponding to the 23-SNP pattern for the MKK individuals in the HapMap data.
rs#	rs10409851	rs4806874	rs10415622	rs12608998	rs8105402	rs7008	rs2238614	rs1860938	rs2110118	rs4807330	rs1640262	rs1736192	rs1640271
alleles	A/G	A/G	A/G	G/T	C/T	C/T	A/G	A/C	C/T	A/G	C/T	A/G	C/T
chrom	chr19	chr19	chr19	chr19	chr19	chr19	chr19	chr19	chr19	chr19	chr19	chr19	chr19		MKK
pos	2677199	2689352	2690696	2704270	2704983	2705978	2706339	2711878	2726144	2728662	2730134	2735678	2750979		Carrier Frequency =		0.402174
NA21440	AA	AA	AA	GG	CC	TT	GG	AA	TT	GG	TT	GG	CC		1
NA21457	AA	AA	AA	GG	CC	TT	GG	AA	TT	GG	TT	GG	CC		2
NA21473	AA	AA	AA	GG	CC	TT	GG	AA	TT	GG	TT	GG	CC		3
NA21583	AA	AA	AA	GG	CC	TT	GG	AA	TT	GG	TT	GG	CC		4
NA21634	AA	AA	AA	GG	CC	TT	GG	AA	TT	GG	TT	GG	CC		5
NA21683	AA	AA	AA	GG	CC	TT	GG	AA	TT	GG	TT	GG	CC		6
NA21716	AG	AA	AA	GG	CC	TT	GG	AA	TT	GG	TT	GG	CC		7
NA21686	AA	AG	AG	GG	CC	TT	GG	AA	TT	GG	TT	GG	CC		8
NA21648	AA	AG	AG	GG	CC	TT	GG	AA	TT	GG	TT	GG	CC		9
NA21521	AG	AG	AG	GG	CC	TT	GG	AA	TT	GG	TT	GG	CC		10
NA21613	AG	AG	AG	GG	CC	TT	GG	AA	TT	GG	TT	GG	CC		11
NA21616	AG	AG	AG	GG	CC	TT	GG	AA	TT	GG	TT	GG	CC		12
NA21520	AA	AG	AG	GT	CT	CT	GG	AA	TT	GG	TT	GG	CC		13
NA21363	AG	AG	AG	GG	CC	TT	GG	AC	CT	GG	CT	GG	CC		14
NA21371	AG	AG	AG	GG	CC	TT	GG	AC	CT	GG	CT	GG	CC		15
NA21577	AG	AG	AG	GG	CC	TT	GG	AC	CT	GG	CT	GG	CC		16
NA21336	AG	AG	AG	GG	CT	TT	GG	AC	CT	GG	CT	GG	CC		17
NA21383	AG	AG	AG	GG	CT	TT	GG	AC	CT	GG	CT	GG	CC		18
NA21647	AG	AG	AG	GG	CT	TT	GG	AC	CT	GG	CT	GG	CC		19
NA21450	AA	AG	AG	GG	CT	NN	GG	AC	CT	GG	CT	GG	CC		20
NA21733	AG	AG	AG	GG	CC	CT	GG	AC	CT	GG	CT	GG	CC		21
NA21436	AG	AG	AG	GG	CC	CT	GG	AC	CT	GG	CT	GG	CC		22
NA21514	AG	AG	AG	GG	CC	CT	GG	AC	CT	GG	CT	GG	CC		23
NA21622	AA	AG	AG	GG	CT	CT	GG	AC	CT	GG	CT	GG	CC		24
NA21678	AA	AG	AG	GG	CT	CT	GG	AC	CT	GG	CT	GG	CC		25
NA21614	AG	AG	AG	GG	CT	CT	GG	AC	CT	GG	CT	GG	CC		26
NA21302	AA	AG	AG	GT	CT	CT	GG	AC	CT	GG	CT	GG	CC		27
NA21741	AG	AG	AG	GT	CT	CT	GG	AC	CT	GG	CT	GG	CC		28
NA21295	AG	AG	AG	GT	CT	CT	GG	AC	CT	GG	CT	GG	CC		29
NA21298	AG	AG	AG	GT	CT	CT	GG	AC	CT	GG	CT	GG	CC		30
NA21307	AG	AG	AG	GT	CT	CT	GG	AC	CT	GG	CT	GG	CC		31
NA21580	AG	AG	AG	GT	CT	CT	GG	AC	CT	GG	CT	GG	CC		32
NA21317	AG	AG	AG	GT	CT	CT	GG	AC	CT	GG	CT	GG	CC		33
NA21339	AG	AG	AG	GT	CT	CT	GG	AC	CT	GG	CT	GG	CC		34
NA21361	AG	AG	AG	GT	CT	CT	GG	AC	CT	GG	CT	GG	CC		35
NA21381	AG	AG	AG	GT	CT	CT	GG	AC	CT	GG	CT	GG	CC		36
NA21400	AG	AG	AG	GT	CT	CT	GG	AC	CT	GG	CT	GG	CC		37
NA21409	AG	AG	AG	GT	CT	CT	GG	AC	CT	GG	CT	GG	CC		38
NA21519	AG	AG	AG	GT	CT	CT	GG	AC	CT	GG	CT	GG	CC		39
NA21485	AG	AG	AG	GT	CT	CT	GG	AC	CT	GG	CT	GG	CC		40
NA21513	AG	AG	AG	GT	CT	CT	GG	AC	CT	GG	CT	GG	CC		41
NA21574	AG	AG	AG	GT	CT	CT	GG	AC	CT	GG	CT	GG	CC		42
NA21575	AG	AG	AG	GT	CT	CT	GG	AC	CT	GG	CT	GG	CC		43
NA21636	AG	AG	AG	GT	CT	CT	GG	AC	CT	GG	CT	GG	CC		44
NA21635	AG	AG	AG	GT	CT	CT	GG	AC	CT	GG	CT	GG	CC		45
NA21723	AG	AG	AG	GT	CT	CT	GG	AC	CT	GG	CT	GG	CC		46
NA21737	AA	AA	AA	GG	CC	TT	GG	AA	TT	GG	TT	GG	CT		47
NA21341	AA	AA	AA	GG	CC	TT	GG	AA	TT	GG	TT	GG	CT		48
NA21344	AA	AA	AA	GG	CC	TT	GG	AA	TT	GG	TT	GG	CT		49
NA21360	AA	AA	AA	GG	CC	TT	GG	AA	TT	GG	TT	GG	CT		50
NA21366	AG	AG	AG	GG	CC	TT	GG	AA	TT	GG	TT	GG	CT		51
NA21739	AG	AG	AG	GG	CT	CT	GG	AC	TT	GG	CT	GG	CT		52
NA21408	AG	AA	AA	GT	CT	CT	GG	AC	CT	GG	CT	GG	CT		53
NA21402	AA	AG	AG	GT	CT	CT	GG	AC	CT	GG	CT	GG	CT		54
NA21304	AG	AG	AG	GT	CT	CT	GG	AC	CT	GG	CT	GG	CT		55
NA21403	AG	AG	AG	GT	CT	CT	GG	AC	CT	GG	CT	GG	CT		56
NA21608	AG	AG	AG	GT	CT	CT	GG	AC	CT	GG	CT	GG	CT		57
NA21619	AG	AG	AG	GT	CT	CT	AG	AC	CT	GG	CT	GG	CT		58
NA21632	AG	AG	AG	GT	CT	CT	AG	AC	CT	GG	CT	GG	CT		59
NA21620	AG	AG	AG	GT	CT	CT	GG	AC	CT	GG	CT	AG	CT		60
NA21717	AG	AG	AG	GT	CT	CT	GG	AC	CT	GG	CT	AG	CT		61
NA21718	AG	AG	AG	GT	CT	CT	GG	AC	CT	GG	CT	AG	CT		62
NA21719	AG	AG	AG	GT	CT	CT	GG	AC	CT	GG	CT	AG	CT		63
NA21401	AG	AG	AG	GT	CT	CT	AG	AA	CT	AG	CT	AG	CT		64
NA21399	AG	AG	AG	GT	CT	CT	AG	AA	CT	AG	CT	AG	CT		65
NA21527	AG	AG	AG	GT	CT	CT	AG	AA	CT	AG	CT	AG	CT		66
NA21576	AG	AG	AG	GT	CT	CT	AG	AA	CT	AG	CT	AG	CT		67
NA21301	AG	AG	AG	GT	CT	CT	AG	AC	CT	AG	CT	AG	CT		68
NA21308	AG	AG	AG	GT	CT	CT	AG	AC	CT	AG	CT	AG	CT		69
NA21423	AG	AG	AG	GT	CT	CT	AG	AC	CT	AG	CT	AG	CT		70
NA21424	AG	AG	AG	GT	CT	CT	AG	AC	CT	AG	CT	AG	CT		71
NA21425	AG	AG	AG	GT	CT	CT	AG	AC	CT	AG	CT	AG	CT		72
NA21435	AG	AG	AG	GT	CT	CT	AG	AC	CT	AG	CT	AG	CT		73
NA21442	AG	AG	AG	GT	CT	CT	AG	AC	CT	AG	CT	AG	CT		74
NA21510	AG	AG	AG	GG	CT	CT	GG	AC	CT	GG	CT	GG	TT		1
NA21404	AA	AG	AG	GT	CT	CT	GG	AC	CT	GG	CT	GG	TT		2
NA21685	AG	AG	AG	GG	CT	TT	GG	AC	CC	AG	CC	AG	CT		3
NA21454	AA	AG	AG	GT	TT	CC	GG	CC	CC	GG	CC	GG	CC		4
NA21417	AG	AG	AG	GT	TT	CC	GG	CC	CT	GG	CC	GG	CC		5
NA21596	AG	AG	AG	GT	TT	CC	AG	CC	CT	AG	CC	GG	CC		6
NA21455	AA	GG	GG	GG	TT	CC	GG	CC	CC	GG	CC	GG	CC		7
NA21784	AG	GG	GG	TT	TT	CC	GG	CC	CC	GG	CC	GG	CC		8
NA21297	AG	GG	GG	GG	CT	CT	GG	AC	CT	GG	CT	GG	CC		9
NA21351	AG	GG	GG	NN	TT	CC	AG	AA	CT	AG	CT	AG	CT		10
NA21303	AG	GG	GG	TT	TT	CC	AG	AC	CC	AG	CC	AG	CT		11
NA21311	AG	GG	GG	GG	CT	CT	GG	CC	CC	GG	CC	GG	CC		12
NA21312	AG	GG	GG	TT	TT	CC	GG	CC	CC	GG	CC	GG	CC		13
NA21364	AG	GG	GG	GG	TT	CC	GG	CC	CT	GG	CC	GG	CT		14
NA21314	AG	GG	GG	GT	CT	CT	GG	CC	CC	GG	CC	GG	CC		15
NA21320	AG	GG	GG	GT	TT	CC	GG	CC	CC	GG	CC	GG	CC		16
NA21357	AG	GG	GG	TT	TT	CC	AG	AC	CC	AG	CC	AG	CT		17
NA21356	AG	GG	GG	TT	TT	CC	GG	CC	CC	GG	CC	GG	CC		18
NA21370	AG	GG	GG	TT	TT	CC	GG	AC	CT	GG	CT	AG	CT		19
NA21379	AG	GG	AG	TT	TT	CC	GG	CC	CC	GG	CC	GG	CT		20
NA21386	AG	GG	GG	GG	CT	CT	GG	AC	CT	GG	CT	GG	CC		21
NA21385	AG	GG	GG	GT	CT	CT	GG	AC	CT	GG	CT	GG	CC		22
NA21405	AG	GG	GG	TT	TT	CC	GG	CC	CC	GG	CC	GG	CT		23
NA21414	AG	GG	GG	TT	TT	CC	AG	AC	CT	AG	CT	AG	CT		24
NA21453	AG	GG	GG	GG	TT	CC	GG	CC	CC	GG	CC	GG	CT		25
NA21489	AG	GG	GG	GT	TT	CC	GG	CC	CC	GG	CC	GG	CT		26
NA21490	AG	GG	GG	GG	TT	CC	GG	CC	CC	GG	CC	GG	CC		27
NA21491	AG	GG	GG	GT	CT	CT	GG	AC	CT	GG	CT	AG	TT		28
NA21582	AG	GG	GG	TT	TT	CC	AG	CC	CC	AG	CC	AG	TT		29
NA21522	AG	GG	GG	TT	TT	CC	GG	CC	CC	GG	CC	AG	CT		30
NA21524	AG	GG	GG	GG	TT	CC	GG	CC	CT	GG	CC	GG	CT		31
NA21597	AG	GG	GG	GT	TT	CC	AG	CC	CC	AG	CC	AG	CT		32
NA21600	AG	GG	GG	GG	CT	CC	GG	CC	CC	GG	CC	GG	CC		33
NA21682	AG	GG	GG	TT	TT	CC	AG	CC	CC	AG	CC	AG	CT		34
NA21722	AG	GG	GG	TT	TT	CC	AG	CC	CC	AG	CC	AG	TT		35
NA21740	GG	GG	GG	TT	TT	CC	AG	CC	CC	AG	CC	AG	CT		36
NA21768	GG	GG	GG	GT	CT	CC	GG	CC	CC	GG	CC	GG	CT		37
NA21776	GG	GG	GG	GG	CC	TT	GG	AC	CT	GG	CT	GG	CC		38
NA21825	GG	GG	GG	GT	CT	CT	AG	AC	CT	AG	CT	AG	CT		39
NA21826	GG	GG	GG	GG	CC	CT	GG	AC	CT	GG	CT	GG	CC		40
NA21738	GG	GG	GG	GT	CT	CC	GG	CC	CC	GG	CC	AG	TT		41
NA21769	GG	GG	GG	GG	CT	CT	GG	CC	CC	GG	CC	GG	CC		42
NA21770	GG	GG	GG	GG	CC	CC	GG	CC	CC	GG	CC	GG	CC		43
NA21333	GG	GG	GG	TT	TT	CC	AA	CC	CC	AA	CC	AG	CT		44
NA21300	GG	GG	GG	GG	CT	CT	GG	AC	TT	GG	CT	GG	CT		45
NA21309	GG	GG	GG	TT	TT	CC	AG	CC	CC	AG	CC	AG	CT		46
NA21313	GG	GG	GG	TT	TT	CC	GG	CC	CC	GG	CC	GG	CT		47
NA21362	GG	GG	GG	TT	TT	CC	GG	CC	CC	GG	CC	GG	CT		48
NA21316	GG	GG	GG	GT	TT	CC	GG	CC	CT	GG	CC	GG	CT		49
NA21318	GG	GG	GG	GT	TT	CC	GG	CC	CT	GG	CC	GG	CT		50
NA21365	GG	GG	GG	GG	CT	CT	GG	AC	CT	GG	CT	GG	CC		51
NA21352	GG	GG	GG	GT	CT	CT	GG	AC	CT	GG	CT	GG	CC		52
NA21353	GG	GG	GG	GT	CT	CT	GG	AC	CT	GG	CT	AG	CT		53
NA21355	GG	AG	AG	TT	TT	CC	GG	CC	CC	GG	CC	GG	CT		54
NA21359	GG	GG	GG	TT	TT	NN	AG	CC	CC	AG	CC	GG	CC		55
NA21368	GG	GG	GG	GT	TT	CC	GG	CC	CT	GG	CC	GG	CT		56
NA21367	GG	AG	AG	GT	CT	CT	AG	AC	CT	AG	CT	GG	CC		57
NA21378	GG	AG	AG	GG	CT	CT	GG	AC	CT	GG	CT	GG	CT		58
NA21382	GG	GG	GG	GT	TT	CT	GG	CC	CC	GG	CC	GG	CC		59
NA21384	GG	GG	GG	GG	CT	CT	GG	AC	CT	GG	CT	GG	CC		60
NA21389	GG	GG	GG	GT	CT	CT	GG	AC	CT	GG	CT	GG	CC		61
NA21388	GG	GG	GG	GT	TT	CC	GG	CC	CC	GG	CC	GG	CC		62
NA21387	GG	GG	GG	GG	CC	TT	GG	AA	TT	GG	TT	GG	CC		63
NA21391	GG	GG	GG	TT	TT	CC	AG	CC	CC	AG	CC	AG	CT		64
NA21390	GG	GG	GG	GG	CT	CT	GG	CC	CC	GG	CC	GG	CT		65
NA21415	GG	GG	GG	GT	CT	CT	GG	CC	CC	GG	CC	GG	CC		66
NA21418	GG	GG	GG	GT	CT	CT	GG	AC	CT	GG	CT	GG	CT		67
NA21420	GG	GG	GG	GT	CT	CT	GG	AC	CT	GG	CT	GG	CC		68
NA21421	GG	GG	GG	TT	TT	CC	GG	CC	CC	GG	CC	GG	CC		69
NA21434	GG	GG	GG	GT	CT	CC	AG	CC	CC	AG	CC	AG	CT		70
NA21410	GG	GG	GG	GT	CT	CC	GG	CC	CC	GG	CC	GG	CC		71
NA21447	GG	AG	AG	GT	CT	CT	GG	AC	CT	GG	CT	GG	CC		72
NA21438	GG	GG	GG	GG	TT	CC	GG	CC	CC	GG	CC	GG	CC		73
NA21439	GG	AG	AG	GG	CT	CT	GG	AC	CT	GG	CT	GG	CC		74
NA21441	GG	GG	GG	TT	TT	CC	AG	CC	CC	AG	CC	AG	CT		75
NA21448	GG	GG	GG	GG	TT	CC	GG	CC	CT	GG	CC	GG	TT		76
NA21451	GG	GG	GG	TT	TT	CC	AG	CC	CC	GG	CC	AG	TT		77
NA21476	GG	GG	GG	TT	TT	CC	GG	CC	CC	GG	CC	AG	CT		78
NA21477	GG	GG	GG	TT	TT	CC	GG	CC	CC	GG	CC	GG	CT		79
NA21475	GG	GG	GG	GT	TT	CC	GG	CC	CC	GG	CC	GG	CT		80
NA21480	GG	GG	GG	GG	CT	CT	GG	AC	TT	GG	CT	GG	CT		81
NA21479	GG	GG	GG	GG	TT	CT	GG	CC	TT	GG	CC	GG	CT		82
NA21478	GG	GG	GG	GT	CT	CT	GG	AC	CT	GG	CT	GG	CC		83
NA21486	GG	GG	GG	GT	TT	CT	AG	CC	CC	AG	CC	AG	CT		84
NA21487	GG	GG	GG	GT	TT	CT	GG	CC	CC	GG	CC	GG	CC		85
NA21488	GG	GG	GG	GG	CT	CT	GG	AC	CT	GG	CT	GG	CC		86
NA21494	GG	GG	GG	GT	TT	CC	GG	CC	CC	GG	CC	AG	TT		87
NA21493	GG	AG	AG	GG	CT	CT	GG	AC	CT	GG	CT	GG	CT		88
NA21525	GG	GG	GG	GT	TT	CC	AG	AC	CT	AG	CC	AG	TT		89
NA21523	GG	GG	GG	GT	CT	CT	AG	AA	CT	AG	CT	AG	CT		90
NA21526	GG	AG	AG	GT	CT	CT	AG	AA	CT	AG	CT	AG	CT		91
NA21528	GG	GG	GG	GT	TT	CC	GG	CC	CC	GG	CC	GG	CC		92
NA21529	GG	GG	GG	GG	CC	CT	GG	CC	CC	GG	CC	GG	CC		93
NA21509	GG	GG	GG	GT	TT	CC	GG	CC	CC	GG	CC	GG	CC		94
NA21512	GG	GG	GG	GG	CT	CC	GG	CC	CC	GG	CC	GG	CC		95
NA21515	GG	GG	GG	TT	TT	CC	AG	CC	CC	GG	CC	GG	TT		96
NA21517	GG	AG	AG	GT	CT	CT	AG	AC	CT	AG	CT	AG	CT		97
NA21573	GG	GG	GG	GG	CC	CT	GG	CC	CC	GG	CC	GG	CC		98
NA21578	GG	GG	GG	GT	TT	CC	AG	CC	CC	AG	CC	AG	CT		99
NA21584	GG	GG	GG	TT	TT	CC	GG	CC	CC	GG	CC	GG	CC		100
NA21587	GG	GG	GG	TT	TT	CC	GG	CC	CC	GG	CC	AG	CT		101
NA21599	GG	GG	GG	GT	CT	CC	GG	CC	CC	GG	CC	GG	CC		102
NA21601	GG	GG	GG	GT	CT	CC	GG	CC	CC	GG	CC	GG	CC		103
NA21615	GG	GG	GG	TT	TT	CC	AG	CC	CC	AG	CC	AG	TT		104
NA21617	GG	GG	GG	GT	CT	CT	AG	AC	CT	AG	CT	AG	CT		105
NA21611	GG	GG	GG	GT	CT	CT	GG	CC	CC	GG	CC	GG	CC		106
NA21631	GG	GG	GG	GT	CT	CC	GG	CC	CT	GG	CT	GG	CC		107
NA21650	GG	GG	GG	GT	CT	CC	GG	CC	CT	GG	CT	GG	CC		108
NA21689	GG	GG	GG	GT	CT	CC	AG	CC	CC	AG	CC	GG	CC		109
NA21693	GG	GG	GG	GG	CC	CT	GG	AC	CT	GG	CT	GG	CT		110

[truncated: 2 more sheets: S11_TSI, S12_YRI]
